# Supplementary material for: Genome-Wide Characterization of Dirigent Proteins in Populus: Gene Expression Variation and Expression Pattern in Response to Marssonina brunnea and Phytohormones
Source: MDPI journal article supplement (doi:10.3390/f12040507), 2021-04-19

---

**Data S1: Text file of the alignment corresponding to the phylogenetic tree in Figure 1**

>PtDIR32

MEENKILWLALTLYMIAAPVYCRYHSQSVPYVSLRKKVSKLHFFFHDRISGKNPTSVLIA  
RPNITKEDKSPALPFGSLFAVYDPLTVGPEPTSEVIGHAEGLYVSSQDVLTLVTYLDFG  
FTSGRFNGSSLSLFSRNAVTEKEREVAVVGGRGKFRMATGFARLKRFTNETASGTVVEC  
RATVVHH

>PtDIR34

MARLLFVTTTSLKAIVYFFLIAMTLYANSARILDGVEPENPAVVGPPVTTAVPAPTTL  
PSGQFQATTPSTVEDGEADPPLPDETVAPDTAVAAPVADAVTPVDDAKPAGSQTTTATTS  
PPLSFFMHDLGGSHPSNRIVTGIIARTEINGIPFSQPNNNFPLQGGTPLVNINNLNL  
INPNNAPLLTGTLGTQNTFLQNTGNNNNVANGNNQPFVTAGNLPAGSALQKLMFGSITV  
VDNELTEGHELGSavigkaQGFYLASSMDGTSHTMAFTVLLHGGENHGDVEDTISFFGVH  
RTATADSQIAIIGGTGKYENAKGYATVETLPQVDQHTTDGVDTIMHFNVLSE

>PtDIR33

MEIHKILFATNKAIACILFLTLAIAFTTSARILDEQPEVPVAPPESYNAVDNPATNV SPL  
PTLAPTQPNPTGAASTSAGATITNPGHTLSFFMHDLGGTNPSTRAVTGIVSNPAVTGQ  
VPFAKPNGANLPINNGVPQNNNNNGLINNNNL PFLTGLGGTTQPVLQNNGNFNNAFNL P  
QSTGGNLP SGSAFQQLMFGTITVIDDEITEGHDLGSGFIGKAQGFYVASSVDGTSQTMAF  
TAMFQSGLYADSLSFFGVHRTGVSESQLAIMGGTGKYVDAQGFAIVKTIPSNQHATDGV  
ETLLEFAVYVSY

>PtDIR35

MGKLPSMLSLVCLLLCMNIINRSSFARSLGNSSPGQHHHHNHHKKITFLMQNVNLNVTHPL  
PKPATTKVTSQIPFPKPLGYFPPSGGIPLQQPNAAVSGTGLSTQTIDVSNIGLSFPDRAT  
LQELEFGSVTEIGEDLFVYGS LVVGKAQGLYVASEDGTSHMMAMTVKFVKNKYKDGLRF  
FGVHKTDVPESHIAVIGGTGKYHSANGYAVINAVGVGSKSTAGEENRTKGNLLFNVYLS

>PtDIR30

MARMAAFV CALIICIAIVPAAYGEYYTKSRHVPRKEKVTRLHFFLHDILSGKNPSAVKVA  
GSNRTEGDKSPTPFGSVYAIDDPLKVGPEPDSKTIGNAQGLYLSSSQDYSKFTIVMCVDF  
GFTEGKFKGSSFSVFSRNPVTEADREAVVGGRGKFRMARGFAKVKTSHFNATNGDAVLE  
YKVTLIH

>PtDIR29

MARMVALVYALIICVAVVPSYGEYYSKGSHVPRKEKVPRLHFSLHDIVSGKSPCAVVKVA  
GSNRTQAGDISAPLGKQLEYIDFAFTTGRFNGSSFGVFSRNPVWEGDREAVAGGRGKF  
RMANGFAKISASFLNVTGDAILE

>PtDIR31

NSKRMNLQFITMGSYVGQRRKKMAKATLVLLVISLVGVMQWAKSTNAESWASRLEAEKEN  
VTNLQFYFHDILSGKNPTAIKVAQPSADNKSPTLFGSIMMADDPLTEGDPNSKPVGRAQ  
GIYSAGQNELALIMAMNFAFTDGIYNGSCISLLGKNPAMNPVREMPIVGGTGLFRFARG  
YAVAQTYWLDLTTGDAIVGYNVTVVH

>PtDIR22

MAMDFAFTDGIYNGSCLSLGKNSAVNPAREMPIVGGTGLFRLGRVNIAQAYWLDVTTGD  
ALVGYNDTVVH

>PtDIR16

MPCFFPLEIISRKKMRTSGFVAIFFMIFLSVSSAYPGWKKQYKPKQLVLYFHDIIYNGQ

---

NAANATAAIVA APEGANL TILAGQFHG NIAVFDDPITLDNNLQSP PVGRAQGMYYDTK  
NTFTAWLGFTFVLNSTKHQGTINFIGADPIMVKS RDISVVG GTGDFFMH RGIATIMTDSF  
EGDVYFRLRVDVKFYECW

>PtDIR13

MAATKLILALLFLLCSSSIASSKNSRRPKPCRRLLVLYFHDIIYNGKNAKNATSAIVGS  
PAWGNKTNLAIPNREFGDVVIFDDPITLDSDLRSTPIGRAQGLYLYDKKEILTAWFGFSFV  
FNSTQLKGTINFAGADDIMKTTRDLSVVG GTGDFFMTRGIATLMTDAYEDDRYFRLRVDV  
QLYECF

>PtDIR18

MARLHFYFHN IQSGENQTTMRIAGPAKTMVVGGSRLFRFTRDYSLLKTISFSPKTRNAV  
EYNVTVVHFRMFLLLVSAVFPFPHFFYL VSTC

>PtDIR20

MATISMARIVPIIVSKLILSTILSPLAIHASKENQGFVRS LDRKLYGFKKEKLTHFRV  
YWHDIYSAPNPTAIPVTSPTSNTSATLFGSLMIDDPLTEKPELSSKLIGRAQGFYGSAG  
QEEAALLMAMNFVFLQ GKYNSTISILGRNHVFSKVREMPVIGGSGLFRFARGYAQANTY  
SFNAKTGD AVEYNVYVLHY

>PtDIR14

MRASCILLCFMFLAVSSAYPGKKKQYKPCKEFVLYFHDILYNGKNAANATSAIVA APEG  
ANL TILAGQNHFGNIIVFDDPITLDNNLHSP PVGRAQGMYYDTKNTFTSWLGFTFALNS  
TQHQGTISFIGADPILVKS RDISVVG GTGDFFMH RGIATIGTDAFEGDVYFRLHVDIKFY  
ECW

>PtDIR19

MARVPIFAPKFIILSLIFSATILVNGDQDHEFVRSMDRKLGLKKEKLSHFKVYWH DIL  
TGNPNSSIQVVPPLNTSITAFGLVRMIDNPLTLGPEMSSRMVGKAQGFYAQASQQDLGLL  
MAMNFAFIEGKYNGSTITVLGRNEVFSTVREMPVIGGSGLFRFARGYVQARTH MVDLKTG  
DATVEYNVYVFHY

>PtDIR21

MYTIDHSLTIMSTKARVFS AIVSHSILLTLLSSFVTGENQDFVRS LDRKLYGLKKEKLTH  
FRVYWHDIYSAPNPTAMPIVRAPSNTSATLFGSISMIDDPLTEKPELSSKLIGRAQGFY  
SAGQEETALLMAMNFVFLQ GKYNSTISILGRNHVFSKVREMPVIGGSGLFRFARGYAQA  
STHSFDLKSGDAVEYNVYVLHY

>PtDIR15

MLCCKTITKNWKLKYKLKIMVQSSTKLRTISAVTMRDLVLKLFFILFLLFTLSVSSAKKS  
FKPKQPCKDLVLYYHDTL FNGTDVANATSAAATDPTKLG NFKFGMLVV FDDPMTKDNHLL  
SRPVARAQGFYFYDKKSTYTAWFAFTLIFNSTKHKGTLNIMGADLMTEETRDFS VVG GTG  
DFFMARGIATIHTDTFQGDYYFRLKMDIKLYECY

>PtDIR17

MLKLSSPYVFI AVLIAALHTAIYVAAIEPVPAGGEPVLELYMHDILGGSNP TAR PITGLL  
GNIYSGQVPFARPVGFVPPKGAVAI PNANGALPTVNGLNGIPLGTGLAGTTFAGNPNGQN  
TNGQIQ TQLGPDGLGLGFGTITVIDDTL TNSPELGSQQLGKAQGVYVASSADGSTQMMAF  
TAMFEGGEFGDSLNFYGIYRIGSAMSRLSVTGGTGKFNAIGFAEVRGLIPPGQAVTDGA  
ETLLRISVHLKY

>PtDIR25

MAKIFANATSSFIFLNVILFSLTLAAAKPEGFSRNLSPKTLGLKREKLSHLHFYFHDIV

---

SGSNPTAVPVARAAMTNNSFSSFGLVTMMDDPLTVKPEISSKLVGRAQGIYASASQSELS  
FLMALNFVFTEGKYNGSTLSILGRNSVLSGIREMPVVGSGGLFRFARGYAQAKTHDLDFK  
TGDAIVEYNVYVFHY

>PtDIR40

SLGMLKGPYVSSSQHIPSLVAYFDGFTAGEFNGSSISVFSRNPISNTERELAVVGRRGE  
FRLATGFAQLKTCFLNATNGDAIV

>PtDIR39

MAKILQNLASSFLVLSIVLSFLIIANAKSQRFTKYLSPATLGLKKEKLSHLHFYFHDIVS  
GKNPTAVRIARADMTNTSSTGFGMVAMIDDPLTMTPELSSKLVGRAQGFYASASQNDVGL  
LMTMNFVFMGKFNSTLSVLGRNSVFSTVREMPIVVGSGGLFRFARGYAQASTHMFDRIT  
GDAVVEYNVYVFHY

>PtDIR37

QGIYASASQSELSFLMALNFVFTEGKYNGSTLSILGRNNVGLFRLARGYAQAKTREIDFK  
TGNATVEYNVYVFHY

>PtDIR38

MAKISTNATSSVFVLFNIIILFSLTLVTVKSDSFSGHLSPKKLGLKREKLSHLHFYFHDI  
VGGRNPTAVPVVRAAITKKSFSFGLVTMMDDPLTVKPEIGSKLVGRAQGIYASASQSEL  
SFLMALNFVFTEGKYNGSTLSILGRNNVFSGIREMPIVVGSGGLFRFARGYAQANTHEIDF  
KTGNAIVEYNVYVFHY

>PtDIR36

MARTLTEVLIFLLLSFILLPITLATARPNTFSRNLSPKKLGLKREKLSHLHFYFHDTVSG  
KNPTAVPVAQAATTNKSSTSFGQVVMIDDPLTVKPEVSSKQVGRAQGIYASASQSEVSFL  
MVLNLFTEGKYNGSTLSILGRNSIFSIREMPIVVGSGGLFRFARGYTQAKTYTVNLKTN  
DAVVEYNVYVFHY

>PtDIR12

MLQTGPLKSTFKANIFQRAKKVACMMRCRIILCTAVSLALLTVLLLALISVPVPHDKNQSD  
NSTRPRPRWLALSLEYIQQPQISSSDVQPAVRSEAGAFIFHRKLTGLENTSRVIGKAQG  
FIIPIEHFAYSGFNIIYLTFTDPDYSGSLSVQAKHVEHKDREELTVVGGTGSFAFARGLA  
VFAQTDQPQTDVGGTYHVKLQLQLRFPDRSHTNIPG

>PtDIR23

MAHPALHLYVLAIIILLALSFKATSTSTSTHNRRGLKSLHFTLYQQEAINKTVYLIVKGV  
TGPVSPSASPFGSLFVNQDLLTISPNSSSKVVGVAEASITSSLDGLTNIVMEKITELK  
HYKGSVSVLGTAHNIKVIDLPVVGTTGDFMFVQGYIKPSLLTFENPNIVYKIEFHLWPS  
YVANHFHSHDRSSTVNGV

>PtDIR24

MAQILHLYLLATLLALSFKATSSSRHSGNNGLSLHFALYQHETINKTGYIIVNGVAGA  
GVGQTTTTPFGTLFAFQDPMVTANISSKVVAIAEGTSITSSFDGLRSISIAKITLRLKNH  
MGSISIVGGTHNIKPADHPVVGTTGDFMFVQGYVTSSPVDLQGLTVTYKIVFHLWPSYA  
NKFSLHDKHVGNDIIT

>PtDIR26

MAKPLFVTTTALKAIVYFLIAMTLSYANSARILDELEPKNPVVSPPATTTVPAPTTL  
PSGQVQATTPTTVEDDQADPPLPDETEAPVTAAPVDNAAPVAPPITDAAPVAPPVTDAA  
PVAPPVTAAPLPVGPINTATRPNGPAPVAVATSDTEAKPAGPQTTTTSPPLSFFMHDI  
LGGSPASNRIVTGIIARTDINGIPFSQPNNNIFPLQDGTPLVNINNINPNTAPLLTGLT

---

GAQNTNTLLQNTGNNNNVVNSNNQPFVTAGNFPAGSALQKLMFGSITVVDELTEGHELGS  
AVIGKAQGFYLASSLDGTSHTMAFSVLLHGGGENHGEIEDTISFFGVHRTATPDSQIAVIG  
GTGKYENAKGYASVETLPQVDQHTTDGADTIMHFNYYLSG

>PtDIR28

MEGMQVLGLALILFMITTHAHGQYYSQSVPYESLPERTTNLHFFFHDTLSGKNPSAVLVA  
RPNITTGQSLAPFGSIFVFHDPLTVGPELTSEVIGNAQGLYVSSSQDIPSLVAYFDFGFT  
TGEFNGSSISVFSRNPINTERELAVVGGRGKFRLLARGFAQLKTYFINATNGDAIVEYNV  
TVIHY

>PtDIR27

MEIHKILSTTNKAIACLLFLTLTIVFTTSARTLDEQPEVPVVPESDNAVDDTVTSVPPL  
PTPLAPTQPNPTGAASTSATISNPGHTLSFFMHDLGGTNPSARAVTGIVSNPAVSGQVP  
FAKPNGANLPINNGVPPQNSNNNGLINNNNLPLTLGLGGTTQPVVQNNGNNFNNAFNLPLS  
NGGNLPSGSTLQQLMFGTITVIDDELTEGHDLRSSFVGKAQGFYVASSLDGTSQTMAFTA  
MFQSGHYADSLFFGVLRGTGVSESQLAIMGGTGKYVNAQGYAIIKIIPSTNQNTDGVET  
LLEFVVYVSY

>PtDIR1

MARSPILASKFITLLLLSSFATILVTGDQDHEFVRS�DRKLLGLKKEKLSHFPLYWHDI  
LTGQNPSAVQVPPPSNTSRTAFGLVRMIDNPLTLGPEMSSKLVGRAQGLYAQASQQDIG  
LLMAMNFAFIEGKNAVFSTVREMPVIGGSGLFRFARGYVQARTHKLDMATGDATVEYNVY  
VFHY

>PtDIR9

MRATCILLCFFTLVASSAHPGKKKQYKPCKELVLYFHDIYNGQNAANATSAIVAAPEG  
ANLTILASQFHFGNIAVFDDPITLDNNLHSPPVGRAQGMYYDTKNTFTAWLGFSFALNS  
TDHQSGSINFIGADPIMIKTRDISVVGTDGDFMHRGIATATDAFEGEVYFRLRVDIKFY  
ECW

>PtDIR4

MASHVACTLFLHLFILFSYLCITTCGAFYEEVTEAIAIKRIEKTTHLHFYFHDIVSGKHP  
TAIRIAGPDNFAFGDTMMADDPLTEGLEISSKPVGKAQGLYALASQNDFCLLMVMNFAFT  
EGEYNGSSISILGRNQILNDVREMPVIGGSGLFRLAHGYALAHTVWFDEQGDATVEYNVY  
VSHY

>PtDIR5

MFKLSSPCFFIVVLIATLHTVTCVAAINPAPAGEEPALELYMHDILGGSNPTARPITGLL  
GNIYSGQVPFARPLGFNPNGVAIPNANGALPTVNGLNGIPLGTGLSGTTFASQNPNGQI  
QTQLGPDGLGLGFGTITVIDDILTNSPELGSQQLGKAQGVYVASSADGTTQMMAFTAMFE  
GGEFGDALNFYGIYKIGSTMSRLSVTGGTGKFKNAIGFAEIRGLIPSGQVGTGDAQTLR  
ITVHLKY

>PtDIR6

MFKEPSASILLALLIALAQYPAAICA AVDPVAATGEEPILELYMHDILGGSNPTARPITG  
LLGNIYSGQVPFARPIGFVPPNGVAIPNANGVIPTVNGINGIPLGTGLAGTTFAGQPNGQ  
NLNGNPQTQLGPDGLGLGFGTITVIDDILTSSPELGSQSVGKAQGVYVASSADGSTQMMA  
FTAMFEGGEYGD SLNFYGYKIGSTMSRLSVTGGTGKFKNARGFAEVRSLIPSGQHFDG  
AETLLRFTVHLSY

>PtDIR8

MRATCILLCFFTLVASSAHPGKKKQYKPCKELVLYFHDIYNGQNAANATSAIVAAPEG

---

ANLTLASQFHFGNIAVFDDPITLDNNLHSPVGRAQGMYYDTKNTFTAWLGFSLVNS  
TDHHGTINFMGADPTTLKTRDISVVGGTGDDFMHRGIATATDAYEGDVYFRLRVDIKFY  
ECW

>PtDIR11

MAMNSKLLLLFALAVVFSCRSTDALKVKATRIQFYMHDDVISGPNPTSVRVAGPDNSTISP  
NATAALFGPIYMMDNPLTVTPDPNSTVVGRAQGIYGMSSQNELSLLMSFTVGFISGPYNG  
STFSVLGRNPIMNEVREMPVVGGTGIFRLARGYCLAKTHSMVGFDIIGYNTVLLHY

>PtDIR7

MRDLVMIFFFFISPLFISLSVSSAKNSFKPEEPCKHIVLYYHDTLFGNGTDAANATSAAAT  
NATKLGNFNFGMLVVDDPMTKDNHLLSRPVARAQGFYFYDMKSTYTAWFAYTLIFNSTE  
HKGTNLIMGADLMMMETRDFSVVGGTGDDFMARGIATIRDTFQGAYYFRLKMDIKLYEC  
Y

>PtDIR2

MAYFLVQILVLLYFTVFLTFCSTTNGKFSEKSPMIISTKRMEKMTRLRFYFHDIPSGKNP  
TNMRIAGPEKTTADSGSTFMVDSPLTEEPNSKLVGRAQGVYAFASQHDAGLLMVLNF  
AFLEGTYNCSALSILGRSPVLDNVREMPIVGGSGLFRFARGYSLKTISSSQKSRNVVVE  
YNVTVVHF

>PtDIR3

MATYIPFILFFVVFSTFFSAINSKFSEQSPLTITMKAMEKKTSLHFYFRDISSGKNQTST  
AIARPLNMTAAANFFGSTSRAADVLLREGPEPTSKLVGREQGIYAFASQHN AVLMMVMNSA  
VLLVERFHCCSNEILAAALGIWNDRV

>PtDIR10

MEAKRLILALFLLFLLSKSSAFPSRKSRVHKPCKRLVFYFHDIIYNGKNSKNATAAIVGA  
PAWGNKTILANQNHFGDLVVDDPITLDNNLHSAPVGRAQGIYVYDKKEIFTAWLGFSEV  
FNSTEHKGSINFAGADPLMNKTRDVSVIGGTGDFIMARGIATLMTDAFEGEVYFRLRVDI  
QLYECW

>OsDIR27

MAYYEIAPVECLQQNELYMHLYLQADRGPNRDQEVILNPKVRPNDFGLTAATAWTISD  
SLDPSAKIVARAEGFHMQTSYNNTSWYASFNIVFEDDRFKGSMQVMGTTAEGQWAISS  
GTGEFALAHGIIKQKVIQSTPGENVKELHVHAFYTPMNDVVPATDGKSWTLGA\*

>OsDIR31

MTRMAASHRAILALILLFSSAATIAAAQPAADGGRTHLHFYMHEFFNGGPNGSMARV  
APPARSGGSLFGFVSVDALREGADPASRLVGRAQGLAAGTSLADGSVTTMLDFVFTDG  
RTRAARWRRSASGCRCPAARRWSGRWSAARARSGWREGTRSAGR\*

>OsDIR28

MATYSSSALFILFLPTFLSMAASTYYDICPVECGCPDQNEVTMHLYLHQFVAGANHPNR  
NEEFVIASSYPNGFGTTLVDDWYLTATNPNDNIVARVQGMHVQAGQSNANMWYTSNIV  
FQDDRFGSTLQVMGIIAASSGEWSVIGGTGEFSMAHGSIKFTTDPSSSTSEDAVRELNIR  
AIYTADNPQAARGTASVANATRLP\*

>OsDIR30

MAPSLLAPRLAVPLLLVLAaaaaadGVADAGAGAGMTHLHFFFHEVFTAGPNGTTATVAP  
PARSGDGSSLGFVGVDMLREGADPASRLVGRAQGVTAGTSLAAADGAGAITTMLSIAF  
TEEGPYAGSTLQVGRAVLGTVMERPVVGGTGKFRMARGHTLSRRVNSSDPDNLLVIEYD  
AYVTTSPi\*

---

>OsDIR29

MASPFVKVIPVRPVLRDQCEITMRLYLHQVVTGPNHNQETMVPSSHPASFGMIVINDWPI  
YDGPDFNTSTIVAHARGMHVQVDQVNNTWYTSMNIEFVDARFNGSKLQVMGTPPETGEWA  
IVGGTGQLAMAYGTIQHNIVKNNPGIETTRQLDIHAFYSTPQTQADVMTTTTNTIDQQAE\*

>OsDIR25

MATPSHSLIFLFLCLPAVLVKANILGDIYPCPKCSQENETSLHMYLHQFPALPGVPNRN  
EYGVINSTEPIGFGQMYVHDWLLTTGTSANENVVGRLOGFHLQAGQTTTSWYMAHTMVFS  
DGSFAGSTIEVFGLLGVKPNGQWSITGGTGTFASAHGTIKFTNSQSSTATDDIRELDIHV  
FHTPEAVI\*

>OsDIR23

MATPSHCLIFLFLCLPAVLVKANIFGDIYPCPKCSQENETSLHMYLHQFPALPGVPNRN  
EYGVINSTEPIGFGQMYVHDWLLTTGTSANENVVGRLOGFHLQAGQTTTSWYMAHTMVFS  
DGSFAGSTIEVSGLLVKPNGQWSITGGTGTFASAHGTIKFTNSQSSTATDDIRELDIHV  
FHTPKAVV\*

>OsDIR9

MAAARFPLLVLCLLPIIVCSVVDDELTHLHFYFHEVDAGTPNATVVNVASLHRNSSTFGD  
VNVLDNALREGPDPAASRLIGRAHGLAVHASLDETGGTAINFVFSYDYGAYSGSTLATQGH  
FITTPSERSIVGGTGKLRFARGYMTSKLLSSTDAIVVVFDMYFTLDH\*

>OsDIR15

MASSSTSSPLPALLLVLLAASSAAGEDVAAAGGRDKLTRIRVYMHERFAGANATALAVV  
PSPLGANEAAGRVAVLDDDELDPDRASSALIGRFQGVVAGTSLPGTAPPASFQSAISLV  
FTAGEHAGSTLSMVGPVLGFAGAIERPLVGGTGAFRMARGYCVMTAAAAASTAVSVVFET  
DLFVLLHKP\*

>OsDIR21

MATWSNASSLIVAAVILLGLSSASVAHGRRGRRSFVSSYDEPCMEMRLYLHDIIYDYSNS  
TSNSTSAAATKPTPLSTAVSNPGYFFGEMVVFNDPMTTEGRALPPSPAMEEETAVRAQGVY  
LYDKKEAPNAWFAFSVVFNSTGRRGTLNLMGADLMSEKTRDLSVVGGTGDFFMISRGVATL  
STDEASADLSYFRVKVDIKLYECYV\*

>OsDIR17

MHGDEEDILYDFSNSTSNSTSAATKPTALSTAVSSPGYFFGRVVFNDPMTTEGRALPPSL  
EETAVRAQGLYLLDKDDFAWFAFSIVFNSTARRGTLNLMGADPNAATRDIVVGGTGD  
FLMSRGVATLRTDAIEGFKYFRVQMDIKLYECYV\*

>OsDIR18

MATWSKPSLIAAVIFLLVSLSSASVANGGRSGRRRLVRSYDEPCMEMRLYLHDILYDYS  
NSTSNSTSAATKPTALSAAVSNPGFFGRMVVFNDPMTTEGRALPPSLEETVRAQGLYL  
YDGKVVFDWFAFTVVFNSTAHHGTLNLMGADPNTEMRDIVVGGTGDFFMISRGVATLRT  
DAFEGFTYFRLQMDIKLYECYV\*

>OsDIR19

MAAWSMASLMIVAIFLLSLTSASVVHGRSSRRRFVRSYDEPCMEMRLYLHDILYDYSNS  
TTNSTSAAATKPTALSTAVSSPGYFFGRVVFNDPMTTEGRALPPSLEETAVRAQGLYLLD  
KKDDFAWFAFSIVFNSTARRGTLNLMGADPNAATRDIVVGGTGDFLMSRGVATLRTDA  
IEGFKYFRVQMDIKLYECYV\*

>OsDIR14

MSPMPSLLLVLVASSAAGVAAGGGGGELKHHLYMHETFSGPNATEGGVVASPFNTTFC

---

QVAVFDNELRTGEDRAASPLVGRYQGFIVGTGRSSPGYLTSATVAFTAGELNGSTLSLEG  
PFFGFAGTAERSIVGGTGKRLRLARGYYLLKLIGKTS PETAVSEIDFFVLMYSSTH\*

>OsDIR22

MATWSNPSLIVAAIFLVISLTSATVANGGRSGGGRRLVRSYDEPCKKMTLYFHDILYDYS  
NSTANSTSAAAAKPTALATAVSPNGTFFGEVVVFDDPMTEGTRALPPSSLRETAAARAQ  
GVYLYDSKEVYDAWF AFSVFNSTGRRGTLNLMGADLMSEKTRDISVVGGTGDFFMSRGV  
ATLR TDAVEGLVYFRLQMDIKLYECYI\*

>OsDIR16

MQGRMVTWSMASVIVAAACIFLSCSASVAHGRRFVRSSSYDKPCKEMRLYLHDILYDYSN  
STSNSTSAAATKPTALATAVPSTGGTFFGQVVVFNDPMTEGTRALPPSLEETAVRAQG VYL  
YNSKEAFNAWF AFSIVFNSTGRRGTLNLMGADIIEKTRDISVVGGTGDFFMSRGVATLR  
TDAFEGFTYFRLQMDIKLYECYVV\*

>OsDIR20

MQATWSKASLIVAAIFLVAGLLSSATVVHGGGGGRRFVRSYDEPCKEMRLYFHDILYDF  
SNSTANSTS AVVASPAALLRAAKNTTIFGTTVFNDPMTEGTSALPPSLEETAVRAQG LYL  
LYDGKAASTLNAWLA FSVFNSTARRGTLSLMGAVLNFALGSHRLDLVGWFYLG LMDIL  
DERERV\*

>OsDIR2

MHNELYMHLIYNQTISGPNPNQLVVVNGSQQAPLFFGLTAISDWITLDGPGPNASVVGRA  
QGMHFQSGHIREKWYTS MNFLFEDTRFN G SMLQVMGTTTPQDDQWAILGGTGEFVAAEGIV  
EHKIVQVDCTGRIYEIKIHAFYIPMNSSAILGKKYKIW\*

>OsDIR1

MEFKKPTIGISSFLLLLLV SAAAAARPTRQLVANDGTVAAPAVAPAAADVAAGVADAPVA  
AANADVPA AAAAAMGPVAGAAAAGAPIGASTIPVAAGAGAVGMN GGGGGGDHPMVFFM HDI  
LGGTNPSARIVAGIVDNTAVTGQLPFARPNGAVLPLNSGVNVKSGAAG AIDNNNIPFLT G  
LGGATNAAFTSNSNNNNNGVPVFAGGSLPQGTTLQKLLFGTMTVV DDELTEAPGLGSPAV  
GRAQGFYIASSEEGVSQTVVVTAMFKEGEFADSSFFGVHRTADSESHLAVVGGTGKFAG  
VKGFAKVAVVRPGGVAATAAEHETDGVETVLQFTVLLIMY\*

>OsDIR4

MAYYAIAPLMCVLPLIQNELCMHLFLHQA WGGPTKNQYAVVIPDSPNGFGGTAANDWVI  
TDGLDASRSNTVGRGQGFTINNSLSKFSFYTSFNLVFENG RFNGSTLQITGVLPQSANGE  
WSITGGTGELALARGIAKFKA VQMSSLSNVYELTLHAYYSPMDSCGQYDFNGKSQNYMSV  
RRNRKFSTLSNNRGSTGIPIEQPQFDKYMSNCVSSTG\*

>OsDIR3

MAYYAIAPILCALVQNELYMHLIYNQVYAGQSTNQLVVITSSQPQGFGITVINDWPITDG  
ANTVGRAQGLHFQSGQTSQKWYTS MNLIFEDTRFSGSSLQVMGTIPQDGEWSIIGGTGEF  
VAAQGIVEHNVIQEAGGAWTYELKIHAFYTPMQSSGVGAYGCNSWKLGP\*

>OsDIR5

MSSFKSPAIPLAALVITVLHIAATHAQIPAA TTTGA AVSATNPQNGGGGVSGGVGATAGG  
AHEPLELYMHDLIGSSPTARPITGLLGNINYNGQVPFARPIGFATPKNGVPIPN SNGAIP  
TYNGNNGIPLDTGLSGAGFLQPAKGASAAQVQLGPDGLSLGFGTITVIDDVLTS GPD LGA  
QPLGRAQGVYVASAADGSAQMMAFTAMMEGGEYGDTLNFFGVYKVGSTMCKLSITGGTGK  
FKGACGFAEVRPLIATGQHVT DGAETLLRISVHLA\*

>OsDIR7

---

MPTPTTIICLLAFLAVLAAATGDGTTTTTHLHFYIHETFAGDNATTASLAPSPLAVAGSN  
SSFSGSVGALDDELREGSDAASRYLGRVEGLVVQADLGNPAAAWTLLTLAFAGGDYNGSTL  
VLDGRVDFGAAGDMERAVVGGTGRFRRARGYSLMTKFGNPTPNTGVFEMDVYVTTMA\*

>OsDIR6

MVDKAAVWLVVIALAAAANGAFAGRVLEEQPAAPAPAEAPVAPVDPLPAPTDPPADTVV  
APAAVPAGGAAATGNAGVGAAGGGAGAGDHHQLTFFMHDILGGSQPSARIVTGVVASAAA  
NGQLPFARPNDNIFPIQGAMPLPQGASNLVNGNNVPYVAGLGGTSSAAIVQGNGNGNGGN  
KNIPFVNAGDLPAGATLQNLLFGTTTVIDDELTEGHELGAADVGRAQGFYVASSQDGTSK  
TLVLTAMFDGGGVEAHGDTLSFFGVHRMAAPESHVAVIGGTGKYENAKGFAVIQTLHPGD  
EHTTDGVETLLQFSIHLI\*

>OsDIR52

MADPSKLQITPCGMLVQGNQINF TKLYLHHTPAGPEQNQSAVTSNDKKTGLGCIVVNNWS  
VYDGIGSDAKLVAYAKGLHVFAGAWHNSFSLVFEDERLKGSTLQVMGLIVEEGDWAIVGG  
TGQFAMATGVILKKMQEQKQYGNIELTIHGFCPLLKGSQCPVTKIGPWGSSHEGTVQDI  
TESPKRLESITLYHGWSVDSISFTYLDHAGEKHKAGPWGGPGGDPIMIEFGSSEFLKEVS  
GTFGPYEGSTVITSINFITNKQTYGPFGRQEGTPFSVPAQNNSSIVGFFGRSGKYINAVG  
VYVQPI\*

>OsDIR53

MGSLCGTMIILAMLPAITMADPYCDCDCPQQCEVKLHYLHQFRAGANHPNRNEEFVT  
SGGPSGLGAGLIHDWSLTGLDPNVNIVGRAQGW HIVASQSSPANWYLSQNIVFQDSKYA  
GSTLQVMGIIEGSEEKVGESVIVGGTGEFTNARGNIKYRAIKKEDVEWIRELDIQVFYTP  
NTPSDVQVAKNITKGN\*

>OsDIR50

MSASNNKLQFTPRSSLFQGNEINF SMLYLHHTPAGPRPDQSGLTGNNRETGLGPLVVNNW  
PVYDGIGRDAKVVARAQGLHIYAGNWHNSFSLVFKDERSGSTLEV MGIVVERGEWAIVGG  
TGQFAMANGVIFKKFHEQKQEGNIMELTIQGFCPVLKGSQTLRDYIVNIMVLDINVLCF  
LMKHLIFDSISFIYLDQAGQKHRAGPWGGPGGDPYMIEFGSSELLKEVSGTYGLYEGWKV  
IRSIKFVTNKKPYGPFGR\*

>OsDIR49

MSASKLQFTPCSTPIQGNEINF SKLYLHHTPAGPRPNQSGVTSTNKETGLGSLVVNNWQV  
YDGIGCDAKVVAHAQGLHVYAGNWHNSFTLVFEDERFKGSTLEV MGIVVEQGEWAIVGGT  
GQFAMANGVIFKKFHEQKKEGNIMELTIKGFCPVLKGSQGLVTKIGPWGGIDGGRAQD  
ITATPKRLESITIHSGWTIDSISFIYFDQAGEKHRAGPWGGPGGDPCTIEFGSSEFLKEV  
SGTFGPYEGWKVIRSIKFVTNKKTYGPFGRQEGTPFSVPVQNNSTIVGFFGRSGKYLDTV  
GIYVHPR\*

>OsDIR43

MPLLLQLALAVAVAVAMVGTATTTTTHTRFYMHDTVTASASGGGPAATAVRVVRGVAAAA  
LPGDAVNRFGLDYAIDDPLTDGADAASSAAVGRARGFYMFSSRTDSALLFSATMEFTAGV  
HRGGAVSVLARDAILDEVRELPVVGGAGVLRGAAGYGLLRTHSFNATTNNAVLQIDLYLS  
V\*

>OsDIR46

MATIAVTQTGTAKITIIHLNGHNLSPYTQERKKSNDQDQKLCPTVVQM QSQQLQCPLLYN  
QQHQCSPLLTINPFLHLPIEMAPKVFPVPLCVVVLAAALAAGPPVADAASAHLHFYMHDV  
LGASAVQVVRGPRGMFGNTVVMDDVLTEGPAATSSVLGRAQQYIVASTGSMDLMVMTMNV



---

VLSSGPFAGSSVTVVGRDDTGAAVRELTVVGGTGQFRMARGYVLWRTIRPDLELDVYVN  
P\*

>OsDIR47

MASSSKLSSAFALAVVLLLAGGVMPAAEAASAHLHFFMHDTLTGAAPTAVQVVNGPRSH  
FGDTIVIDDVLTAAASRSSAAVGRAKGQYVWASSGNPELLVTMEVVLTSQPFAGSSVTVV  
GRDDIAAPVRELSVVGGTGEFRMASGYVLWKTVSLDHPNAILELDVYVNP\*

>OsDIR48

MAAMLISRRSIQLVLVVAAVVAIAGAVHAAAGETTATTTTHIKVYWHDVVSGPSPTAVQVA  
RAATTNSSASFFGAVVVIDDPLTSGPDLNASSPVGRAQGTYSAGKDTVALLMNMNFVFQ  
SGRYNGSTVAIMGRNEVFAAVREMAVVGGTGVFRWARGYAQARTHTLDMKTGDATVEYNL  
YINH\*

>OsDIR51

MASYEITSRGALIKGREFNFSNLYLYHIYNSSEPNNQQIIDNVSSSTAMGGLTVNNWTVY  
DGVASDATLVARGQGLHTYAGNWHCSFTLVFEDERFNGSTLEVKGIFEETHDWAIVGGTG  
EFAMASGVIKKTVEYERTPEGTHIELTIRGFCPDF\*

>OsDIR42

MASLSSVLVGCFLLA-AAVFLHRNGASTTTTTTHLHFYMHDAYTGPAPTAMRVVSGRSLLD  
GDNGNGNGNGDDGSPPRQFGDIVALNNALTEGPSAGSARVGTAQGFVVRVSEGGVLSDL  
LHMVLEAGEHRGSSVTAKGRIDMDAGERESVVIGGTGRFRLARGYMTKNYDYSLATGGI  
VEIDLULKH\*

>OsDIR39

MASLCSLLSSSLILAVAVFLRHHIGASTTTTTTHLHFYMHDTYTGPAPTTMRVVSGRS  
LLDDGDGNNDATSPSSSSPPRRQFGDIVLNSALTEGPSANKGGMVTDVSLHVLEAG  
EHRGSSVTAKGRIDMDAGERESVVIGGTGRFRFARGYMTKNHYKKAHDRDRHYRCWNN\*

>OsDIR40

MAASSLSPSLLGCSFLIAAAVLLRRHDSAAATTTTTTHLHFYMHDAYTGPAPTAMRVV  
SGRSLLQSTTDIVDGSSPPRQFGDIVLNNALTEGPDAGSARVGTAQGFVVRVSEGLVT  
DLSMHLVMEAGEHRGSSVAIKGRIDVGVGVRESVVVGGTGRFRLARGYMASSSYDYSLAA  
GGVVEIHVYLQH\*

>OsDIR45

MAHELIPAQTTSSTHKHLNLDLFLHQAYSQPNKNQQVLIKPGGNYLQPGGNYLQFGVLAV  
HDWPLYDDEDQSKGKLVARARGHHMQTVQEMVDQWFTTGQIVFDGSEFVGSTLLVAGTY  
TTGQKGEWAIVGGTGKFSLAQGVHKEMVRTNPGTGEVRLLQIRAKYSTVESCEQNAED  
KQKNHDIRLKTLLQFARYREWIEREPSALVNFDYKASEVDAAINDTNRHLLGTGGFGT  
VYKAVIRGATVAVKITNEISHRGVRAFAQEFISRANAVSPFKPILGVSLQGLIRFL\*

>AtDIR6

MAFLVEKQLFKALFSFLLVLLFSDTVLSFRKTIDQKKPCKHFSFYFHDILYDGDNVANA  
TSAIIVSPPGLGNFKFGKFVIFDGPITMDKNYLSKPVARAQGFYFYDMKMDFNSWFSYTL  
VFNSTEHKGTNLNMGADLMMEPTRDLSVVGGTGDFFMARGIATFVTDLFQGAKYFRVKMD  
IKLYECY

>AtDIR10

MAGQKILLSLVIALVVTFAAAARLLDEENAFSATTTTLGSGSGSTGIGFGAGTGSSGSGS  
TGFGFGAGSGSGSGSTGSLGAGTGSIPSSGSGPGLPTASSVPGSLAGGSGSLPTTG  
SATGAGAGTGSALGGGPGAGSALGGGAGAGPALGGGAGAGPALGGGAGAGSALGGGGAGA

---

GPALGGGVAGSGSALGGGASAGPDNTLVFFMHDILGGSNPTARAVTGVVANPALSGQLPF  
AKPNGANLPVSNGVPSNNNNNGIVNNNNVPFLVGLGGTTANILQNNNNNGNNILNGFPVAS  
GGQLPSGSALQMLMFGTMTVIDDELTEGHELGSLLGKAQGYVVASAIDGTSQTMAFTAM  
FESGGYEDSISFFGLRTAVSESHIGVMGGTGKYVNARGFAILKTFTGSSGTQQNQPHQF  
TDGLETVVECTVYLSY

>AtDIR22

MIQKAVSNSSTSFSGSITMTDNALTSQVNVSTVVGQSQGFYAGAAQRELGLMAMNFAFK  
TGKYNGSTITILGRNTVFSKVREMTTVVGSGIFRLARGYVEARTKWFDPKTGDATVEYNC  
YVLHY

>AtDIR9

MAKALHITIFLFISSNLLAFINSARLLDEIQPQPQLVPTGQIPTVAPTEAEEEDGTDDN  
PGLATTTTTASAVTVPAGPAEATEPLLEFFMHDVLGGSHPSARVVTGIVAQTEVNGIPFS  
KASNSIFPVDNGVPLVNSNNINSVINPNTAPLLTGLGGAQTSTVIQNTNGNSNDALSANS  
LPFVTAGNLPPGAALQHLMFGTITVDDDELTESELGSAVIGRAQGFYLASSLDGTSQTL  
SLTVLLHGEHDQHDTLDDAISFFGVHRTASHASQIAVIGGTGKFEHAKGYAIVETLHNQD  
NQHITDGQDTILHFSVYLYKA

>AtDIR15

MKSTLIFFTLCLSMVMARHESYYGNTKPAKLNEEKVTRVRFYLHDTLSGQNPTAVRIA  
HANLTGGSASPVGFGSLFVIDDPLTVGPEKHSKEIGNQGMYVSGCKDLSKFTIVMYADL  
AFTAGKFNGSSISIFSRNPVAEEVGEREIAIVGGRGKFRMARGFVKVTKNKIDMKTGDAV  
LRYDATVYHY

>AtDIR24

MAKALSLTIFLFLIASNVQSARLLDEVQTQPQLVPQVPEEEDDSPQAVTTTPTPIPLPG  
PATGGPEPILEFFMHDVLGGSHPSARVVTGIVAQTEVNGIPFSKSSNNIFPVDNAVPLVN  
ANSINNINPNTAPLLTGLSGSQANTVIQNSNGNSQGSLSNNLPFVTTGQLPPIAALQQ  
LMFGSITVDDDELTEGHELGSIIIGRAQGFYLASSLDGTSQTLSTVLLHEDHDDHDTLD  
DAISFFGVHRTASHASHIAVVGGTGRFEHAKGYAVVETLHNQEDQHVTGDGHDHDTILHFSVY  
LTYKA

>AtDIR4

MGKNLGLVVSFYLCITFALGEYFSETRPITPKQLVVTNLHFFHDTLTAPNPSAILIAKP  
THTRGDNDSSSPFGSLFALDDPLTVGDPKSEKIGNARGMYVSSGKHVPTLTMYVDFGF  
TSGKFNGSSIAVFSRNTITEKEREVAVVGGRGRFRMARGVAQLNTYYVNLNGDAIVEYN  
VTLYHY

>AtDIR2

MAKRFLLLPLLLSTILLSVSVTESEAYSTTKPCQGYKPKDFTHLHFYFHDVISGDKPTA  
VKVAEARRTNSSNVNFGVIMIADDPLTEGPDPSKEVGRAQGMALTAMKNISFTMVFNL  
AFTAGEFNGSTVAMYGRNEIFSKVREMPIIGGTGAFRFARGYAQAKTYKVVGGLDAVEYN  
VFIWH

>AtDIR19

MGSFLSFFLISSRTLALVLISVTGETLESNFLHHKKEKLTHFRVYWHDIVTGQDSSSVSI  
MNPPKKYTGATGFGLMRMIDNPLTLTPKLSSKMVGRAQGFYAGTSKEEIGLLMAMNFAIL  
DGKYNGSTITVLGRNSVFDKVREMPVIGGSLFRFARGYVQASTHEFNLTGNAIVEYNC  
YLLHY

>AtDIR18

---

MMKQSPFSLTISFLIAALFTATTALDPAPEDPIFELYMHDILGGSSPTARPITGLLGNI  
YNGQVPFAKQIGFVPPQNGVAIPNANGAMPTVNGINGIPLGTGLSGTAFSGQNLNGIQTQ  
LGPDGLSLGFGTTITVIDDIITSGPDLGSQPLGKAQGVYVASSADGSTQMMAFTAMLEGGE  
YNDNLNFYGIYRIGSAMSHLSVTGGTGRFKNACGFAEVRPLIPAGQHFVDGAEMLLRIIV  
HLKY

>AtDIR3

MSKLILILTAQILLLTATALAGKNGEDFARTINRKHLGLGKKEKLTHLRVYWHDIVTGRN  
PSSIRIQGPVAKYSSSYFGSITMIDNALTLDPINSTVVGQAQGMVVGAAQKEIGLLMA  
MNLAFKTKGYNGSTITILGRNTVMSKVREMPVVGSGMFRFARGYVEARTKLFDMMKTGDA  
TVESNCYILHY

>AtDIR1

MAKRFLLLLPLSSILLAVSVTAYSTTTPYQGYKPEKFTHLHFYFHDVISGDKPTAVKV  
AEARPTTLNVKFGVIMIADDPLTEGPDPSKEVGRAQGMVASTAMKDIVFTMVFNVYFT  
AGEFNGSTIAVYGRNDIFSKEVRELPIIGGTGAFRFARGYALPKTYKIVGLDAVVEYNVFI  
WH

>AtDIR17

MEDTGSIKQEAQSHPPGIFEIPGEPVAVINGVPDEPQTDCAKDEPISSGTVSGGEWLE  
GREVRKFFLGRYYSCTVTKFDKQSGWYRVEYEDGDSEDLDWSELEEVLLPLDTKNSNTNA  
QSEYGEAGQRVNVKAPYPGHKPEKLVTTTVKAPYPGHKPEKLIPLVDDILTVGPEITSEE  
VGRAQGFASADQNNFGLLMAFNVFVTKGEFSGSTVSMYGRNPFSKVREMPIIGGTGAF  
RFRGRYAQAKTFTFNTTSGNAVVKYNVYIWH

>AtDIR13

MANQIYIISLIFLSVLLYQSTTVLSFRQPFNLAKPCKRFVLYLHNVAYDGDNTDNATSAA  
IVNPLGLGDFSGFKFVIMDNPVTMDQNMLSEQVARVQGGFFYHGKTKYDTWLSWSVFNFS  
TQHGKALNIMGENAFMEPTRDLPVVGGTGDFVMTRGATFMTDLVEGSKYFRVKMDIKLY  
ECYY

>AtDIR21

MASLYLLLLPLFLALILAATITESKSFSTTVKAPYPGHKPKDLTHLHFYFHDIVSGDKP  
TSVQVANGPTTNSSATGFLVAVVDDKLTVGPEITSEEVGRAQGMVYASADQNKLGLLMAF  
NLVFTKGKFSSTVAMYGRNPVLSKVREMPIIGGTGAFRFRGRYALAKTLVFNITSGDAV  
VEYNVYIWH

>AtDIR206

MSKLILILTAQILLLTATALAGKNGEDFARTINRKHLGLGKKEKLTHLRVYWHDIVTGRN  
PSSIRIQGPVAKYSSSYFGSITMIDNALTLDPINSTVVGQAQGMVVGAAQKEIGLLMA  
MNLAFKTKGYNGSTITILGRNTVMSKVREMPVVGSGMFRFARGYVEARTKLFDMMKTEAT  
ERNLQKMSFFKSFAGNPREAAAMAMVQSSSYRVLSGKSCSNLRRNTPLDSFLAKGRSSV  
KAFSFLYVSRFSTEPNNEFGHSSKRRSRGPVMAAKKASEGEKQEDGKYKQTVDLPKTGFG  
MRANSLTREPQLKWEENQVFKRVSDNNNGGSFILHDGPPYANGDLHMGHALNKILKDI  
INRYKLLQNYKVQYVPGWDCHGLPIELKVLQSLDQEVKELTPLKLRAKAAKFAKATVKT  
QMESFKRFGVWADWNNPYLTLDPEYEAQIEVFGQMALKGYTYRGRKPVHWSPPSRTALA  
EAELEYEPGHISKSIYAIFKLVGGAKTSLDEFIPNIYLA VWTTPWTMPANA AAVAVNAK  
LQYSVVEVQSFEDESTVTSNKKKIPGKVLKNQQKLFVIVATDLVPALEAKWGVKLSISK  
TFLGSDLENCRYTHPIDNRDCPVVIGGDYITTESGTGLVHTAPGHGQEDYATGLKYGLPL  
VSPVDDEGKFTEEAGQFRGLSVLGEGNTAVVSYLDENMSLVMEESYAHKYPYDWRTKKPT

---

IFRATEQWFASVEGFRTATMDAINNVKWVPHQAVNRISAMTSSRSDWCISRQRTWGVPIPI  
AFYHVKTKEPLMNEETINHVKSIIISQKGSDAWWYMSVEDLLPEKYRDKAADYEKGTDTMD  
VWFDSGSSWAGVLGKREGLSFPADVYLEGTDQHRGWFQSSLLTSIATQGKAPYSAVITHG  
FVLDEKGMKMSKSLGNVVDPRLVIEGGKNSKDAPAYGADVMLRWVSSVDYTGDLVIGPQI  
LRQMSDIYRKLRLGTLRYLLGNLHDWRVDNAVPHYQDLPIIDQHALFQLENVVKNIQECYEN  
YQFFKIFQIIQRFITVDLSNFYFDIAKDRLYTGGTSSFTRRSCQTVLSTHLLSILRVIAP  
IVPHLAEDVWQNLFPFEYRNEDGSAAEFVFELKWPTLNEQWLSFPAEDVLFWQRLLRLRTE  
VNVKLELARNEKMIGSSLEAKVYLHTADAGMAAKLLEMSEAKNEADTLQRIFITSQVEVL  
SSMEKEMISSVQHTGEYVEGENKVWIGVSRAEGSKCERCWNYSQGQVGSFSDHPTLCGRCF  
SVIVANPPEPAVA AVNSLA

>AtDIR8

MTNLILIFAAQILLFYAVASVGDELGRTMNGKHLGPYKKEKLTHLRVYWHNSVNGRNPSS  
VMIQQPVLNSSLGSLTMMDDPLTFDVPRNATVVGQAQGMVAAAQGEIGFLMVMNFAFT  
TGKYNSTITILGRNVVMSKVREMPVVGSGIFRFARGYVEARTKSFDLKAGC

>AtDIR25

MAGCKVLFFLILALAITFVSAARLLDEEEDIGLVPLPTTSPGPLPTVGLGPFPTANSIPA  
TGIASGTGSASGGLGSLGTNTGPGPLSTTGSSLLPVASSGTLPTVTPGPGPLPTSSGLLPGA  
SSGNLPGSGSGLPTVSGSAAATGLGAGAGSVIGGSVPDNTLVFFMHDILGGSNPTARAV  
TGVVANAALSGQIPFAKPNGANLPVSNGVPSDNNNNNGILNNNNVPLLVLGGTTSNQLQN  
NGNNMLNGLPVANGGQLPSGSSLQMLMFGTLTVMDNELTEGHELGSLLGKAQGFYVASA  
LDGTSQMTAFTAMFESGGYEDSISFFGVHRTAASESHLGVMGGTGKYVNARGFAIVKTFT  
GSSGTQQQQPHQFTDGLTVLECTVYLSY

>AtDIR16

MMIKQSPFLLLTITLFTVAVFVAALDPAPEDPIFELYMHDLGGSSPTARPITGLLGNIY  
NGQVPFAKQIGFTPPENGIAIPNANGALPTVNGINGVPLGTGLSGTAYSGQNLNGIQTQL  
GPDGLSLGFGTITVIDDILTSGLDLSQPLGKAQGVYVASSADGSTQMMAFTAMLEGGEY  
NDNLNFYGIYRIGSAMSHLSVTGGTGRFKNACGFAEVRPLIPSGQHEVDGAESLLRIIVH  
LKY

>AtDIR23

MAKEEYVSRMLVMLIMIMPLVAQGSRLHSWANRLEETGKDKVTNLQFYFHDTLSGKNPTA  
VKVAQGTDEKSPTLFGAVFMVDDALTETADPKSKLVGRAQGLYGSSCKEEVGLIMAMSF  
CFEDGPYKDISTISMIGKNSAMNPIREMPIVGGTGMFRMARGYAIARTNWFDPKTGDAIVG  
YNVTIMH

>AtDIR20

MAKLIFFLAVQILFLAVVSSAGDGEDFARTMDRKLGLHKKLTHFKVYWHDLSGPNP  
TSIMIQQPVTNSSYFGAISMIDNALTAKVPMNSTVLGQAQGFYAGAAQKELGFLMAMNFA  
FKTGKYNSTITILGRNTALSEVREMPIVGGSGLFRFARGYVEARTKWINLKNGDATVEY  
SCYVLHY

>AtDIR7

MAKLILIIVTQILLIAAVVSARKGENFAKTIDKKHFGLRKEKLTHFRVYWHDLSGSNPS  
SVVINPPISNSSFFGSVTVIDNRLTTEVAVNSTLVGQAQGIYAATGQRDASALMVMNFAF  
KTGKYNSSIAILGRNAVLTKVREMPVIGSGLFRFARGYVEARTMWFDQKSGDATVEYS  
CYVLHY

>AtDIR12

---

MTNQIYKQVFSFFLSVLLQSSTVSYVPKSFDLKKPCKHFVLYLHNIAYDGDNAANATAA  
TIVKPLGLGDHSFGELIINNPNVTLDQNYLSKPVARAQGFYFYNMKTNYNAWVAWTLVFN  
STKHKGFTTMDANPFGLPQPARDSLIVGGTGDFLMTRGIATFKTKLTQGSKYFCVEMNIK  
LYECY

>AtDIR27

MVQPHGRGGGKGALIFRRTLTEGPENNSRIVGKAEGFIIPHEDFANSDFNVIYLTLETPE  
YTGSVSIRSMDTHKLKEVMEVVGGTGAFAFARGIAMFNEIDDHEEEAVTTYRVKLLRF  
PHTSHVDPQ

>AtDIR14

MANQIYFLSLICLSVLLCQSYTVSSFQKSLDLAKPCKRFVLHLHDIAYDGDNAANATSAA  
IVNPLGLGDFSFGKVFIMDDPVTMDQNYLSKPVARVQGFFCYHGKATYDAWIAWTVVFNS  
TQHKGAFTIMGENPFMEPTRDLPIVGGTGDFIMTRGIATLTTHIDGSKYFRVKLDIKLY  
ECYH

>AtDIR5

MVGQMKSFLLFVFLVLTKTVISARKPSKSQPKCKNFVLYYHDIMFGVDDVQNATSAAV  
TNPPGLGNFKFGKLVIFDDPMTIDKNFQSEPVARAQGFYFDMKNDYNWFAWTLVFNST  
QHKGTLMNMGADLMMVQSRDLSVVGTTGDFMSRGIVTFETDTFEGAKYFRVKMDIKLYE  
CY

>AtDIR11

MLQITNMATPFLLLLLPLIFSTVLLLTITVTQSKPYSKTTPFQGNKPKLTHLHFYFHDI  
ISGDKPTTIRVAEAPGTNSSATVFGAVLIVDAPVTEGPELSSKEVGRAQGLYASTDMKTF  
GFTMVFNVFTEGEFNGSTAALYGRNPILLEERELPIGGTGDFRFARGYALPKTYKVVN  
IDAVVEYNVFIWH

>PDIR23

MAAPQSSNLSLLAVIILLVGGTHHAVGMELKKTEIEFYMHDEVVKAMKNITTMKVTHGPHGFGMIRVIDNVLTEGL  
QQNSK ELGRARGMYVQDSLGSANLLMVLTVIFQAGEHSGSTLCLQGQDDTKQREISVVGGTGHRHATGHAILET  
QLSMGANSILNFNITVLH

>PDIR24

MAAPQSSNLSLLAVIILLVGGTHHAVGMELKKTEIEFYMHDEVVKAMKNITTMKVTHGPHGFGMIRVIDNVLTEGL  
QQNSKELGRARGMYVQDSLGSANLLMVLTVIFQAGEHSGSTLCLQGQDDTKQREISVVGGTGHRHATGNAILET  
QLSMGANSILNFNITVLH

>PDIR25

MSSRLLFPVMAVIVIVFLQAAAGESEMNIIVVYMHDLNLTGRHQTSFPVAGLNGSSSNPGKFGTLVVISDAITKRPYVN  
TNPGNIVGRAQGTYYVNTNPVTGLDFFMVFTLIFQNMEYNGSTLEIQGTDRFDQPQCEYAVVGGTGKFRFARGY  
AVVTVESASGPNAVLFNTTFLVPS

>PDIR26

MGSGLLFPAMATATLVIVFVQAAAGQSEMNMFLFYMTDNLTGSSETAFPVAGFNGSSSDPGKFGTLVIINDAITKRP  
EITKSDTDNLVGRAQGTYYVNTNPVTGLDFLMLFTIIFQNMEYNGSTLQIQGTETFGRPQREYAVVGGTGKFRFARGH  
VVCTTESSSGKNAVPRFNITFRTN

>PDIR28

MGSGFSFSAMAVIVFLLAVAGEAEINMVFIHDNLRGSNVTAIPVAGLNGSSSNAGKFGTIVTISDVITRRPQITESDS  
DNIVGRAQGTYYVNTNPVTGLDFLMVMTIVFQDMEYNGSTLEIQGTDRFTQPQREFAVVGGTGKFRFARGYAIASTE  
ALSSPNSIIKFNTTVQI

>PDIR30

---

MAKEAVWSMAFILCIAMAARSEKEINMVFYMHDDVAGSNRTAAQVGAGSSIKPGFGAMVVIDDALTRTPSPDSTL  
VGRAQGMYSLSLAITSPDSLLAFTAILEWPGEYSGSTLSIQGGNRMFMDQREVSVVGGTGKFRFALGYATVHN  
STALQFNVTVRVP

>PDIR35

NMVFYTHDNLSGNNVTAFSVAGLNGSSSSAGKFGTVVVMDDVTKRPKINESDADNTVGRAQGIFVNTNLVTGL  
DTLLVFTVIFHDMYGGSTLEIQGTDRFAYPHREVAVVGGTGKFRFARGYAILTELLSGTDSVIKENTTLRTA

>Pdh1

MGVKVALVFFMFFVLCSPFPHLVLFHDIYNGSNAANATSAIVAAPEGANLTKLASQHFHGNIVVDDPVTLDN  
NLHSNQVGRAQGSYIYDTKNTFTAWLGFTFVLNSTDHRGTITLAGADPTLKKTRDVSIVGGTGDFFMHRIATIMT  
DAFEGQVYFRLRVDVKFYECW

>liDIR1

MVSQMKQFLLVFILLVLSKTVISATKPSKSQSKPCKNFVFFYHDIMFGVDDVQNATSAAVTNPPGLGNFKFGKLVIF  
DDPVTLDKNYQSEPVARAQGFYFYDMKNDYNWFSYTLVFNSTQHKGTNLNIMGADLMMEKTRDLSVVGTTGDF  
FMSRGIVTFETDTFEGAKYFRVKMDIKLYECY\*

>liDIR2

MASLVEKQLFKSLFSFLLVLLFSDTVFSSQKTLQQRKPKHFSFYFHDILYDGDNVANATSAAIVSPPGLGNFKFGK  
FVIFDDPITMDKNYLSEPVARAQGFYFYDMKNTDFNAWFCYTLVFNSTEHKGTNLNIMGADLMMEPTRDLSVVGTTG  
DFFMARGIATFVTDIFQGAKYFRVKMDIKLYECY\*

MAIWNGRVLNLCILWLLVSIVLLNGIDCHSRKKKLPKPCRNVLVYFHDIIYNGKNAGNATSTLVAAPQGANLTIMT  
GNYHFGLAVFDDPITVDNNLHSPVVGRAQGFYFYDMKNTFSAWLGFTFVLNSTDYKGTITFGGADPILAKYRDIS  
VVGTTGDF LMARGIATIDTDAYEGDVYFRLRVNITLYECY\*

>TpDIR5

MKAIRVLHLCFLCLLVSAILLKSADCHSWKKKLPKPCKNVLVYFHDIIYNGKNAENATSALVAAPEGANLTIMTGN  
NHFGNLAVFDDPITLDNNLHSPVVGRAQGFYFYDMKNTFSAWLGFTFVLNSTDHKGTITFNGADPILTKYRDISV  
GGTGDFLMARGIATISTDSYEGEVYFRLRVNITLYECY\*

>FiDIR1

MVSKTQIVALFLCFLTSTSSATYGRKPRRRPCKELVFYFHDVLFKGNVYHNATSIVGSPQWGNKTAMAVPFNYG  
DLVVFDPPITLDNNLHSPVVGRAQGMFYDQKNTYNWLGFSFLFNSTKYVGTNLNAGADPLLNTKTRDISVGGT  
GDFFMARGVATLMTDAFEGDVYFRLRVDINLYECW\*

>LuDIR1

MAISRSNIALFFIFFICLSSANSSAKKKQHTPCKELVLFHDIYNGHNKANATAAIVAAPEGANRTILAGEFHFHGNIA  
VFDDPITLDNNLHSPVVGRAQGMFYDQKNTFTAWLGFTFSLNSTEHQGTINFMGADPLMNKTRDVSIVGGTGDF  
FMHRGVATIMTDSYEGEVYFRLRVDIMKDYDCW\*

>LuDIR5

MKHSSSHSSCLPFLTTTTPIFLLLLSLICPAAATWRTPTHHQHGRNPNKPKQLVLYYHDILFHGNGDQGNATSA  
AAANATKLGDKYKFGMLVVFDDPVTKDGHLSKAVARAQGFYFYDMKSTYNWFAFAYTLVFNSTEHKGTINIMGA  
DMMSEKTRDLSVVGTTGDFFMARGIATFRTDTFQGDNYFRLEMDIKLYDCYKY\*

>LuDIR6

MKHTSSFHLLTTTTLIFLLLLSLISPGDATWRTPSHHLQHAKHPKPKQLVLYYHDILFHGNGDQGNATSA  
ATKLGDKYKFGMLVVFDDPVTKDGHLSKAVARAQGFYFYDMKSTYNWFAFAYTLVFNSTDHKGTNLNIMGADMM  
SEETRLDLSVVGTTGDFFMARGIATFRTDTFQGDYFRLEMDIKLYECY\*

>GhDIR4

MRGTSVLSWILILCVCQAAVRSQYYSDTLPYQPRPVLVTNLHFYMHEFTGTTAVVLTQANITSNNSSVPFATLVAV  
NDPLRTGPEPDSELIGNVQGISLLAGSNASSTQYIEFGFNTGKFNGSSLSVFSRGPGLAVVGGRGQFAMATGTALF  
NPILINATNVIMEFNFTVIHY

>GhDIR3

MRGTSVLSWILIICLSQVAVRSQYYSDTVPYHPRPVVVTNLHFYMHEFTGTTAVVLTQANITSNNSSVPFATLVAIN  
DPLRTGPEPDSELIGNVQGMSSLLAGSNASSTQYIDFEFNTGKFNGSSLSVFSRGEAGLAVVGGRGQFAMATGTALF  
NPLLINATNVIMEFNFTVIHY

**Table S1: List of primers for the qRT-PCR analyses**

| Primer<br>Name | primer sequences(5'-3') | Primer<br>Name | primer sequences(5'-3')        |
|----------------|-------------------------|----------------|--------------------------------|
| DIR1-qF        | CATTAACCTTAGGGCCTGAAA   | DIR22-qF       | ATGGCGATGGACTTTGCATTCAC        |
| DIR1-qR        | ATCTCTCTCACCGTCGAGAACA  | DIR22-qR       | GTGAACTACTGTATCATTGTAGCC       |
| DIR2-qF        | TTGGCAGCACTTTTATGGTG    | DIR23-qF       | CTGACCTTCGAGAACCCCAA           |
| DIR2-qR        | ACAATTGGCATTTCCTGAC     | DIR23-qR       | TTGCAACATAGGAAGGCCAGT          |
| DIR3-qF        | GCAATTGCTCGGCCCTAAA     | DIR24-qF       | ATGTTTGTTCAGGGTACGTGAC         |
| DIR3-qR        | TCGAAGTTGGTCTGGCCCT     | DIR24-qR       | AGTAATTATATCATTTCCACATGTT      |
| DIR4-qF        | AGCCTGTTGGAAAAGCTCAA    | DIR25-qF       | GGCCTCAAGCGAGAGAAACT           |
| DIR4-qR        | ATCACCTTGCTCGTCAAACC    | DIR25-qR       | CACCGTCAAAGGGTCATCCA           |
| DIR5-qF        | AACCCAACTTGACCAGACG     | DIR26-qF       | CGTTACCACTACAGCGCTCA           |
| DIR5-qR        | CCCTAACTCAGGGCTGTTGG    | DIR26-qR       | CATCTTCAACGGTGGTGGGA           |
| DIR6-qF        | TTGACCCTGTAGCAGCAACC    | DIR27-qF       | GTCTCCGAGTCTCAGCTTGC           |
| DIR6-qR        | GCCATTGGCATTGGGATGG     | DIR27-qR       | GGTCTCAACACCATCGGTCTG          |
| DIR7-qF        | GTGCCGATTTGATGATGATG    | DIR28-qF       | AATGCCCAAGGGCTGTATGT           |
| DIR7-qR        | GAATCGTGGCAATCCCTCTA    | DIR28-qR       | ACTGAGCAAACCCTCTAGCC           |
| DIR8-qF        | AGGCGCCAACCTTAACCATCT   | DIR29-qF       | CCTCGCCTTCACTTCTCCCTTCATG      |
| DIR8-qR        | TACATGCCTTGTGCCCTACC    | DIR29-qR       | CCAGTAGTAACATTGAGAAAGCTGG<br>C |
| DIR9-qF        | AGGCGCCAACCTTAACCATCT   | DIR30-qF       | GGGTCTAATCGCACCGAAGG           |
| DIR9-qR        | TACATGCCTTGTGCCCTACC    | DIR30-qR       | TCTGGCTCAGGTCCCACCTTT          |
| DIR10-qF       | GATGCATTCGAGGGTGAAGT    | DIR31-qF       | CCTTGGTGGGAGTCATGCAA           |
| DIR10-qR       | CAAATGCTGAACTCGAAGCA    | DIR31-qR       | GAGTTCGGATCAGGCCCTTC           |
| DIR11-qF       | ATGGCAGCACGTTTAGTGTG    | DIR32-qF       | TCATTGGTCATGCAGAGGGG           |
| DIR11-qR       | ATGGCATCAAATCCAACCAT    | DIR32-qR       | AAGCCGAGCAAACCCTGTAG           |
| DIR12-qF       | TCACGGGTCATAGGAAAAGC    | DIR33-qF       | CTTGCCACAAACAAGGCCA            |
| DIR12-qR       | AAATGCGAATGACCCAGTTC    | DIR33-qR       | TGCAGCCCCAGTTGGATTAG           |
| DIR13-qF       | GACGAGCACAAGGGCTTTAC    | DIR34-qF       | ATCATCGCCCGCACTGAAAT           |
| DIR13-qR       | ATATCATCCGCCCCAGCAAA    | DIR34-qR       | AGTGGAGCGTTGTTGGGTT            |
| DIR14-qF       | GCTCGGCTTTACATTTGCTC    | DIR35-qF       | TGGCAATGACAGTAAAGTTGTG         |
| DIR14-qR       | CCCAGTGCCTCCAACCTACAG   | DIR35-qR       | TACTCTTAGAACCAACCAACCG         |
| DIR15-qF       | ACGGAGGAGACAAGGGATTT    | DIR36-qF       | ATTTATGCATCGGCATCACA           |
| DIR15-qR       | TGGTAGGACTTGGTGCACAG    | DIR36-qR       | CTCTTGCAAAACGGAAAAGC           |
| DIR16-qF       | ACCAGTTGGTAGGGCACAAG    | DIR37-qF       | TATGCATCGGCATCACAAAG           |
| DIR16-qR       | GCGGAGCCTGAAATACACAT    | DIR37-qR       | AGTCTTCGCCTGAGCATAGC           |
| DIR17-qF       | ACGGATTGGGACTAGGCTTT    | DIR38-qF       | AGGAAGAGCACAGGGGATTT           |

|                |                         |                |                         |
|----------------|-------------------------|----------------|-------------------------|
| DIR17-qR       | GACATTGCGCTACCAATCCT    | DIR38-qR       | AGCCTCTTGCAAACCTGAAA    |
| DIR18-qF       | GCCCGCCTGCATTTCTACTT    | DIR39-qF       | TGATCCCTTGACCATGACGC    |
| DIR18-qR       | CGGCTACCTCCAACAACCAT    | DIR39-qR       | CACCGACAATCGGCATCTCT    |
| DIR19-qF       | TGTGCCACCATTGAACACTT    | DIR40-qF       | GGGAGCTCCATCAGTGTGTT    |
| DIR19-qR       | ATGGCCATTAACAAGCCAAG    | DIR40-qR       | AAACAATCGCATCACCGTTAG   |
| DIR20-qF       | AAGCTGCCCTATTGATGGCT    | UBIC_qF        | TTGCTTGAGGAACCTGAAC     |
| DIR20-qR       | AAGCCCACTACCTCCGATCA    | UBIC_qR        | GTGAGGACCGATTACAGT      |
| DIR21-qF       | GTCACCGGAGAAAACCAAGA    | β-Actin_qF     | GACCTTCAATGTGCCTGCAA    |
| DIR21-qR       | TGATGTGTTGGAAGGTGCTC    | β-Actin_qR     | ACCATCACCAGAATCCAGCA    |
| Primer<br>Name | primer sequences(5'-3') | Primer<br>Name | primer sequences(5'-3') |
| β-Actin_qF     | GACCTTCAATGTGCCTGCA     |                |                         |
| β-Actin_qR     | ACCATCACCAGAATCCAGC     |                |                         |

**Table S2: Sequences of 10 predicted motifs of the PtDIR proteins**

| Name    | E-value  | Sites | Width | best possible matched sequences          | annocation      |
|---------|----------|-------|-------|------------------------------------------|-----------------|
| Motif 1 | 1.5e-571 | 35    | 41    | HFGNIAVFDDPITLDNNLHSPVVGRAQGMYYDTKNTFTAW | dirigent domain |
| Motif 2 | 7.4e-346 | 39    | 21    | REMPVVGSGSLFRFARGYAQA                    | dirigent domain |
| Motif 3 | 8E-196   | 32    | 15    | LHFYFHDIVSGKNPT                          | dirigent domain |
| Motif 4 | 3E-195   | 18    | 29    | MAMNFVFLQGKYNGSTISILGRNHVFSKV            | dirigent domain |
| Motif 5 | 3E-111   | 17    | 15    | KTGDAIVEYNVYVFH                          | —               |
| Motif 6 | 1.1E-92  | 8     | 21    | DAYEGDVYFRLRVDIKFYECW                    | —               |
| Motif 7 | 2.5E-77  | 16    | 21    | GFSFVFNSTEHKGSINFAGAD                    | —               |
| Motif 8 | 5.9E-56  | 8     | 21    | HEFVRSLDRKLLGLKKEKLSH                    | —               |
| Motif 9 | 1.1E-36  | 8     | 29    | RATCILLCFFTLVASSAHPGKKKQYKPC             | —               |
| Motif10 | 2.1E-33  | 6     | 21    | NATSAIVAAPEGANLTILAGQ                    | —               |

**Table S3: Ka/Ks analysis of *PtDIR* gene pair duplications**

| Sequence        | Ka      | Ks       | Ka/Ks   | P-Value     | Length | Divergence<br>(MYA) |
|-----------------|---------|----------|---------|-------------|--------|---------------------|
| PtDIR8&PtDIR14  | 0.08205 | 0.507598 | 0.16163 | 6.77E-19    | 549    | 16.92               |
| PtDIR8&PtDIR16  | 0.09762 | 0.751976 | 0.12982 | 4.13167E-28 | 546    | 25.06               |
| PtDIR5&PtDIR17  | 0.06396 | 0.177159 | 0.36102 | 2.89E-05    | 735    | 5.9053              |
| PtDIR8&PtDIR9   | 0.02188 | 0.103373 | 0.21166 | 1.80E-04    | 549    | 3.44                |
| PtDIR21&PtDIR20 | 0.09651 | 0.231157 | 0.41752 | 2.00E-04    | 579    | 7.7                 |
| PtDIR25&PtDIR38 | 0.06549 | 0.193886 | 0.33777 | 1.07E-04    | 585    | 6.46                |
| PtDIR7&PtDIR15  | 0.06211 | 0.489172 | 0.12696 | 1.06E-18    | 537    | 16.31               |
| PtDIR9&PtDIR14  | 0.0731  | 0.475496 | 0.15374 | 1.18E-17    | 549    | 15.85               |
| PtDIR9&PtDIR16  | 0.09721 | 0.736983 | 0.1319  | 1.24E-27    | 546    | 24.57               |
| PtDIR10&PtDIR13 | 0.17468 | 1.0662   | 0.16383 | 3.10E-37    | 558    | 35.54               |
| PtDIR16&PtDIR14 | 0.09004 | 0.318012 | 0.28314 | 2.15E-08    | 546    | 10.6                |
| PtDIR25&PtDIR36 | 0.16179 | 0.456072 | 0.35474 | 3.21E-09    | 573    | 15.2                |
| PtDIR27&PtDIR33 | 0.05994 | 0.236042 | 0.25394 | 3.77E-11    | 927    | 7.86                |



|                 |         |          |         |          |     |       |
|-----------------|---------|----------|---------|----------|-----|-------|
| PtDIR36&PtDIR38 | 0.17797 | 0.480504 | 0.37039 | 7.38E-09 | 573 | 16.02 |
|-----------------|---------|----------|---------|----------|-----|-------|

**Table S4: Transcription factors predicted for the binding promoters of the *PtDIR* genes**

|         |                 |              |                                                                      |
|---------|-----------------|--------------|----------------------------------------------------------------------|
| PtDIR40 | G-box           | GCCACGTGGA   | cis-acting regulatory element involved in light responsiveness       |
| PtDIR40 | G-box           | CACGTG       | cis-acting regulatory element involved in light responsiveness       |
| PtDIR40 | G-Box           | CACGTG       | cis-acting regulatory element involved in light responsiveness       |
| PtDIR40 | ERE             | ATTTTAAA     |                                                                      |
| PtDIR40 | ERE             | ATTTTAAA     |                                                                      |
| PtDIR40 | ERE             | ATTTTCATA    |                                                                      |
| PtDIR40 | TC-rich repeats | ATTCTCTAAC   | cis-acting element involved in defense and stress responsiveness     |
| PtDIR40 | ABRE            | CACGTG       | cis-acting element involved in the abscisic acid responsiveness      |
| PtDIR40 | ABRE            | ACGTG        | cis-acting element involved in the abscisic acid responsiveness      |
| PtDIR36 | ABRE            | ACGTG        | cis-acting element involved in the abscisic acid responsiveness      |
| PtDIR36 | ABRE            | CGTACGTGCA   | cis-acting element involved in the abscisic acid responsiveness      |
| PtDIR36 | MRE             | AACCTAA      | MYB binding site involved in light responsiveness                    |
| PtDIR36 | CGTCA-motif     | CGTCA        | cis-acting regulatory element involved in the MeJA-responsiveness    |
| PtDIR36 | MBS             | CAACTG       | MYB binding site involved in drought-inducibility                    |
| PtDIR36 | G-Box           | CACGTT       | cis-acting regulatory element involved in light responsiveness       |
| PtDIR36 | ERE             | ATTTTAAA     |                                                                      |
| PtDIR36 | TCA-element     | CCATCTTTTT   | cis-acting element involved in salicylic acid responsiveness         |
| PtDIR36 | MBSI            | TTTTTACGGTTA | MYB binding site involved in flavonoid biosynthetic genes regulation |
| PtDIR37 | TC-rich repeats | GTTTCTTAC    | cis-acting element involved in defense and stress responsiveness     |
| PtDIR37 | ERE             | ATTTTCATA    |                                                                      |
| PtDIR37 | ERE             | ATTTTAAA     |                                                                      |
| PtDIR38 | ABRE            | ACGTG        | cis-acting element involved in the abscisic acid responsiveness      |
| PtDIR38 | LTR             | CCGAAA       | cis-acting element involved in low-temperature responsiveness        |
| PtDIR38 | G-box           | CACGAC       | cis-acting regulatory element involved in light responsiveness       |
| PtDIR38 | ERE             | ATTTTAAA     |                                                                      |
| PtDIR38 | G-Box           | CACGTT       | cis-acting regulatory element involved in light responsiveness       |
| PtDIR39 | CGTCA-motif     | CGTCA        | cis-acting regulatory element involved in the MeJA-responsiveness    |
| PtDIR39 | CGTCA-motif     | CGTCA        | cis-acting regulatory element involved in the MeJA-responsiveness    |
| PtDIR39 | CGTCA-motif     | CGTCA        | cis-acting regulatory element involved in the MeJA-responsiveness    |
| PtDIR39 | TC-rich repeats | ATTCTCTAAC   | cis-acting element involved in defense and stress responsiveness     |
| PtDIR39 | TC-rich repeats | ATTCTCTAAC   | cis-acting element involved in defense and stress responsiveness     |
| PtDIR39 | MRE             | AACCTAA      | MYB binding site involved in light responsiveness                    |

---

|         |                 |                  |                                                                      |
|---------|-----------------|------------------|----------------------------------------------------------------------|
| PtDIR39 | G-box           | CACGAC           | cis-acting regulatory element involved in light responsiveness       |
| PtDIR39 | MBS             | CAACTG           | MYB binding site involved in drought-inducibility                    |
| PtDIR39 | MBS             | CAACTG           | MYB binding site involved in drought-inducibility                    |
| PtDIR32 | CGTCA-motif     | CGTCA            | cis-acting regulatory element involved in the MeJA-responsiveness    |
| PtDIR32 | ERE             | ATTTCATA         |                                                                      |
| PtDIR32 | MBS             | CAACTG           | MYB binding site involved in drought-inducibility                    |
| PtDIR32 | MBS             | CAACTG           | MYB binding site involved in drought-inducibility                    |
| PtDIR33 | ERE             | ATTTTAAA         |                                                                      |
| PtDIR33 | LTR             | CCGAAA           | cis-acting element involved in low-temperature responsiveness        |
| PtDIR33 | TATC-box        | TATCCCA          | cis-acting element involved in gibberellin-responsiveness            |
| PtDIR33 | TC-rich repeats | GTTTCTTAC        | cis-acting element involved in defense and stress responsiveness     |
| PtDIR34 | TC-rich repeats | GTTTCTTAC        | cis-acting element involved in defense and stress responsiveness     |
| PtDIR34 | ABRE            | ACGTG            | cis-acting element involved in the abscisic acid responsiveness      |
| PtDIR34 | ABRE            | ACGTG            | cis-acting element involved in the abscisic acid responsiveness      |
| PtDIR34 | ABRE            | ACGTG            | cis-acting element involved in the abscisic acid responsiveness      |
| PtDIR34 | G-box           | CACGTC           | cis-acting regulatory element involved in light responsiveness       |
| PtDIR34 | MBSI            | aaaAaaC(G/C)GTTA | MYB binding site involved in flavonoid biosynthetic genes regulation |
| PtDIR34 | TCA-element     | CCATCTTTTT       | cis-acting element involved in salicylic acid responsiveness         |
| PtDIR34 | G-Box           | CACGTT           | cis-acting regulatory element involved in light responsiveness       |
| PtDIR34 | G-Box           | CACGTT           | cis-acting regulatory element involved in light responsiveness       |
| PtDIR34 | ERE             | ATTTCATA         |                                                                      |
| PtDIR34 | MBS             | CAACTG           | MYB binding site involved in drought-inducibility                    |
| PtDIR35 | WUN-motif       | AAATTTCTT        |                                                                      |
| PtDIR35 | WUN-motif       | AAATTACT         |                                                                      |
| PtDIR35 | TC-rich repeats | GTTTCTTAC        | cis-acting element involved in defense and stress responsiveness     |
| PtDIR35 | CGTCA-motif     | CGTCA            | cis-acting regulatory element involved in the MeJA-responsiveness    |
| PtDIR35 | LTR             | CCGAAA           | cis-acting element involved in low-temperature responsiveness        |
| PtDIR35 | TCA-element     | CCATCTTTTT       | cis-acting element involved in salicylic acid responsiveness         |
| PtDIR29 | TC-rich repeats | GTTTCTTAC        | cis-acting element involved in defense and stress responsiveness     |
| PtDIR29 | CGTCA-motif     | CGTCA            | cis-acting regulatory element involved in the MeJA-responsiveness    |
| PtDIR29 | ABRE            | ACGTG            | cis-acting element involved in the abscisic acid responsiveness      |
| PtDIR29 | ABRE            | CACGTG           | cis-acting element involved in the abscisic acid responsiveness      |
| PtDIR29 | ABRE            | ACGTG            | cis-acting element involved in the abscisic acid responsiveness      |
| PtDIR29 | MRE             | AACCTAA          | MYB binding site involved in light responsiveness                    |
| PtDIR29 | WUN-motif       | AAATTTCTT        |                                                                      |
| PtDIR29 | G-box           | CCACGTAA         | cis-acting regulatory element involved in light responsiveness       |
| PtDIR29 | G-box           | TACGTG           | cis-acting regulatory element involved in light responsiveness       |
| PtDIR29 | G-box           | CACGTG           | cis-acting regulatory element involved in light responsiveness       |
| PtDIR29 | TGA-element     | AACGAC           | auxin-responsive element                                             |
| PtDIR29 | LTR             | CCGAAA           | cis-acting element involved in low-temperature responsiveness        |
| PtDIR29 | G-Box           | CACGTG           | cis-acting regulatory element involved in light responsiveness       |
| PtDIR29 | ERE             | ATTTCATA         |                                                                      |
| PtDIR29 | LTR             | CCGAAA           | cis-acting element involved in low-temperature responsiveness        |
| PtDIR29 | MBSI            | TTTTTACGGTTA     | MYB binding site involved in flavonoid biosynthetic genes regulation |

---

|         |                 |              |                                                                      |
|---------|-----------------|--------------|----------------------------------------------------------------------|
| PtDIR29 | MBS             | CAACTG       | MYB binding site involved in drought-inducibility                    |
| PtDIR29 | ERE             | ATTTTAAA     |                                                                      |
| PtDIR31 | MBSI            | TTTTTACGGTTA | MYB binding site involved in flavonoid biosynthetic genes regulation |
| PtDIR31 | TCA-element     | CCATCTTTTT   | cis-acting element involved in salicylic acid responsiveness         |
| PtDIR31 | TCA-element     | CCATCTTTTT   | cis-acting element involved in salicylic acid responsiveness         |
| PtDIR31 | WUN-motif       | CCATTTCAA    |                                                                      |
| PtDIR31 | CGTCA-motif     | CGTCA        | cis-acting regulatory element involved in the MeJA-responsiveness    |
| PtDIR26 | G-box           | TAACACGTAG   | cis-acting regulatory element involved in light responsiveness       |
| PtDIR26 | G-box           | TACGTG       | cis-acting regulatory element involved in light responsiveness       |
| PtDIR26 | MBS             | CAACTG       | MYB binding site involved in drought-inducibility                    |
| PtDIR26 | MBS             | CAACTG       | MYB binding site involved in drought-inducibility                    |
| PtDIR26 | ERE             | ATTTCATA     |                                                                      |
| PtDIR26 | ERE             | ATTTTAAA     |                                                                      |
| PtDIR26 | ERE             | ATTTTAAA     |                                                                      |
| PtDIR26 | TC-rich repeats | ATTCTCTAAC   | cis-acting element involved in defense and stress responsiveness     |
| PtDIR26 | MRE             | AACCTAA      | MYB binding site involved in light responsiveness                    |
| PtDIR26 | MRE             | AACCTAA      | MYB binding site involved in light responsiveness                    |
| PtDIR26 | WUN-motif       | AAATTACT     |                                                                      |
| PtDIR26 | ABRE            | ACGTG        | cis-acting element involved in the abscisic acid responsiveness      |
| PtDIR27 | MRE             | AACCTAA      | MYB binding site involved in light responsiveness                    |
| PtDIR27 | TC-rich repeats | ATTCTCTAAC   | cis-acting element involved in defense and stress responsiveness     |
| PtDIR27 | CGTCA-motif     | CGTCA        | cis-acting regulatory element involved in the MeJA-responsiveness    |
| PtDIR27 | CGTCA-motif     | CGTCA        | cis-acting regulatory element involved in the MeJA-responsiveness    |
| PtDIR27 | ERE             | ATTTCATA     |                                                                      |
| PtDIR27 | LTR             | CCGAAA       | cis-acting element involved in low-temperature responsiveness        |
| PtDIR27 | LTR             | CCGAAA       | cis-acting element involved in low-temperature responsiveness        |
| PtDIR28 | LTR             | CCGAAA       | cis-acting element involved in low-temperature responsiveness        |
| PtDIR28 | LTR             | CCGAAA       | cis-acting element involved in low-temperature responsiveness        |
| PtDIR28 | MBS             | CAACTG       | MYB binding site involved in drought-inducibility                    |
| PtDIR28 | ERE             | ATTTCATA     |                                                                      |
| PtDIR25 | CGTCA-motif     | CGTCA        | cis-acting regulatory element involved in the MeJA-responsiveness    |
| PtDIR25 | TC-rich repeats | ATTCTCTAAC   | cis-acting element involved in defense and stress responsiveness     |
| PtDIR25 | TC-rich repeats | ATTCTCTAAC   | cis-acting element involved in defense and stress responsiveness     |
| PtDIR25 | ABRE            | ACGTG        | cis-acting element involved in the abscisic acid responsiveness      |
| PtDIR25 | ABRE            | GCAACGTGTC   | cis-acting element involved in the abscisic acid responsiveness      |
| PtDIR25 | WUN-motif       | AAATTACT     |                                                                      |
| PtDIR25 | MBS             | CAACTG       | MYB binding site involved in drought-inducibility                    |
| PtDIR25 | G-Box           | CACGTT       | cis-acting regulatory element involved in light responsiveness       |
| PtDIR23 | WUN-motif       | AAATTACT     |                                                                      |
| PtDIR23 | TC-rich repeats | ATTCTCTAAC   | cis-acting element involved in defense and stress responsiveness     |
| PtDIR23 | TC-rich repeats | GTTTCTTAC    | cis-acting element involved in defense and stress responsiveness     |
| PtDIR23 | ERE             | ATTTTAAA     |                                                                      |
| PtDIR23 | TATC-box        | TATCCCA      | cis-acting element involved in gibberellin-responsiveness            |
| PtDIR24 | ABRE            | CACGTG       | cis-acting element involved in the abscisic acid responsiveness      |

---

|         |                 |            |                                                                   |
|---------|-----------------|------------|-------------------------------------------------------------------|
| PtDIR24 | ABRE            | ACGTG      | cis-acting element involved in the abscisic acid responsiveness   |
| PtDIR24 | ABRE            | TACGGTC    | cis-acting element involved in the abscisic acid responsiveness   |
| PtDIR24 | ABRE            | ACGTG      | cis-acting element involved in the abscisic acid responsiveness   |
| PtDIR24 | ABRE            | ACGTG      | cis-acting element involved in the abscisic acid responsiveness   |
| PtDIR24 | CGTCA-motif     | CGTCA      | cis-acting regulatory element involved in the MeJA-responsiveness |
| PtDIR24 | TC-rich repeats | ATTCTCTAAC | cis-acting element involved in defense and stress responsiveness  |
| PtDIR24 | ERE             | ATTTTAAA   |                                                                   |
| PtDIR24 | G-Box           | CACGTG     | cis-acting regulatory element involved in light responsiveness    |
| PtDIR24 | G-Box           | CACGTT     | cis-acting regulatory element involved in light responsiveness    |
| PtDIR24 | LTR             | CCGAAA     | cis-acting element involved in low-temperature responsiveness     |
| PtDIR24 | G-box           | ACACGTGT   | cis-acting regulatory element involved in light responsiveness    |
| PtDIR24 | G-box           | CACGTG     | cis-acting regulatory element involved in light responsiveness    |
| PtDIR24 | G-box           | TACGTG     | cis-acting regulatory element involved in light responsiveness    |
| PtDIR22 | ABRE            | ACGTG      | cis-acting element involved in the abscisic acid responsiveness   |
| PtDIR22 | WUN-motif       | AAATTACT   |                                                                   |
| PtDIR22 | MRE             | AACCTAA    | MYB binding site involved in light responsiveness                 |
| PtDIR22 | ERE             | ATTTTAAA   |                                                                   |
| PtDIR22 | ERE             | ATTTTAAA   |                                                                   |
| PtDIR22 | G-Box           | CACGTT     | cis-acting regulatory element involved in light responsiveness    |
| PtDIR22 | TCA-element     | CCATCTTTTT | cis-acting element involved in salicylic acid responsiveness      |
| PtDIR22 | LTR             | CCGAAA     | cis-acting element involved in low-temperature responsiveness     |
| PtDIR13 | TCA-element     | CCATCTTTTT | cis-acting element involved in salicylic acid responsiveness      |
| PtDIR13 | MBS             | CAACTG     | MYB binding site involved in drought-inducibility                 |
| PtDIR13 | CGTCA-motif     | CGTCA      | cis-acting regulatory element involved in the MeJA-responsiveness |
| PtDIR14 | TCA-element     | CCATCTTTTT | cis-acting element involved in salicylic acid responsiveness      |
| PtDIR14 | ERE             | ATTTTAAA   |                                                                   |
| PtDIR14 | ERE             | ATTTCATA   |                                                                   |
| PtDIR14 | MBS             | CAACTG     | MYB binding site involved in drought-inducibility                 |
| PtDIR14 | ABRE            | TACGGTC    | cis-acting element involved in the abscisic acid responsiveness   |
| PtDIR14 | ERE             | ATTTTAAA   |                                                                   |
| PtDIR15 | MBS             | CAACTG     | MYB binding site involved in drought-inducibility                 |
| PtDIR15 | LTR             | CCGAAA     | cis-acting element involved in low-temperature responsiveness     |
| PtDIR15 | TATC-box        | TATCCCA    | cis-acting element involved in gibberellin-responsiveness         |
| PtDIR15 | MRE             | AACCTAA    | MYB binding site involved in light responsiveness                 |
| PtDIR15 | MRE             | AACCTAA    | MYB binding site involved in light responsiveness                 |
| PtDIR15 | TC-rich repeats | GTTTCTTAC  | cis-acting element involved in defense and stress responsiveness  |
| PtDIR16 | G-Box           | CACGTT     | cis-acting regulatory element involved in light responsiveness    |
| PtDIR16 | G-Box           | CACGTT     | cis-acting regulatory element involved in light responsiveness    |
| PtDIR16 | ERE             | ATTTTAAA   |                                                                   |
| PtDIR16 | LTR             | CCGAAA     | cis-acting element involved in low-temperature responsiveness     |
| PtDIR16 | TATC-box        | TATCCCA    | cis-acting element involved in gibberellin-responsiveness         |

[illegible]

|         |                 |            |                                                                   |
|---------|-----------------|------------|-------------------------------------------------------------------|
| PtDIR20 | CGTCA-motif     | CGTCA      | cis-acting regulatory element involved in the MeJA-responsiveness |
| PtDIR20 | MBS             | CAACTG     | MYB binding site involved in drought-inducibility                 |
| PtDIR20 | ERE             | ATTTTAAA   |                                                                   |
| PtDIR20 | ERE             | ATTTTAAA   |                                                                   |
| PtDIR20 | TCA-element     | CCATCTTTT  | cis-acting element involved in salicylic acid responsiveness      |
| PtDIR20 | TGA-element     | AACGAC     | auxin-responsive element                                          |
| PtDIR20 | LTR             | CCGAAA     | cis-acting element involved in low-temperature responsiveness     |
| PtDIR21 | G-box           | CACGAC     | cis-acting regulatory element involved in light responsiveness    |
| PtDIR21 | G-box           | TAACACGTAG | cis-acting regulatory element involved in light responsiveness    |
| PtDIR21 | G-box           | TACGTG     | cis-acting regulatory element involved in light responsiveness    |
| PtDIR21 | MBS             | CAACTG     | MYB binding site involved in drought-inducibility                 |
| PtDIR21 | ERE             | ATTTTAAA   |                                                                   |
| PtDIR21 | ERE             | ATTTTAAA   |                                                                   |
| PtDIR21 | ABRE            | ACGTG      | cis-acting element involved in the abscisic acid responsiveness   |
| PtDIR12 | CGTCA-motif     | CGTCA      | cis-acting regulatory element involved in the MeJA-responsiveness |
| PtDIR12 | CGTCA-motif     | CGTCA      | cis-acting regulatory element involved in the MeJA-responsiveness |
| PtDIR12 | CGTCA-motif     | CGTCA      | cis-acting regulatory element involved in the MeJA-responsiveness |
| PtDIR12 | TC-rich repeats | GTTTTCTTAC | cis-acting element involved in defense and stress responsiveness  |
| PtDIR12 | MRE             | AACCTAA    | MYB binding site involved in light responsiveness                 |
| PtDIR12 | MRE             | AACCTAA    | MYB binding site involved in light responsiveness                 |
| PtDIR12 | ERE             | ATTTTAAA   |                                                                   |
| PtDIR1  | G-box           | CACGTC     | cis-acting regulatory element involved in light responsiveness    |
| PtDIR1  | G-box           | TACGTG     | cis-acting regulatory element involved in light responsiveness    |
| PtDIR1  | G-box           | CACGTG     | cis-acting regulatory element involved in light responsiveness    |
| PtDIR1  | G-Box           | CACGTGAAA  | cis-acting regulatory element involved in light responsiveness    |
| PtDIR1  | G-Box           | CACGTG     | cis-acting regulatory element involved in light responsiveness    |
| PtDIR1  | ERE             | ATTTTAAA   |                                                                   |
| PtDIR1  | ERE             | ATTTTAAA   |                                                                   |
| PtDIR1  | MBS             | CAACTG     | MYB binding site involved in drought-inducibility                 |
| PtDIR1  | MBS             | CAACTG     | MYB binding site involved in drought-inducibility                 |
| PtDIR1  | CGTCA-motif     | CGTCA      | cis-acting regulatory element involved in the MeJA-responsiveness |
| PtDIR1  | CGTCA-motif     | CGTCA      | cis-acting regulatory element involved in the MeJA-responsiveness |
| PtDIR1  | CGTCA-motif     | CGTCA      | cis-acting regulatory element involved in the MeJA-responsiveness |
| PtDIR1  | CGTCA-motif     | CGTCA      | cis-acting regulatory element involved in the MeJA-responsiveness |
| PtDIR1  | WUN-motif       | AAATTACT   |                                                                   |
| PtDIR1  | ABRE            | ACGTG      | cis-acting element involved in the abscisic acid responsiveness   |

|        |                 |            |                                                                   |
|--------|-----------------|------------|-------------------------------------------------------------------|
| PtDIR1 | ABRE            | ACGTG      | cis-acting element involved in the abscisic acid responsiveness   |
| PtDIR1 | ABRE            | CACGTG     | cis-acting element involved in the abscisic acid responsiveness   |
| PtDIR1 | ABRE            | ACGTG      | cis-acting element involved in the abscisic acid responsiveness   |
| PtDIR2 | WUN-motif       | CCATTTCAA  |                                                                   |
| PtDIR2 | WUN-motif       | AAATTCCT   | wound-responsive element                                          |
| PtDIR2 | ERE             | ATTCATA    |                                                                   |
| PtDIR2 | ERE             | ATTCATA    |                                                                   |
| PtDIR2 | TC-rich repeats | GTTTTCTTAC | cis-acting element involved in defense and stress responsiveness  |
| PtDIR3 | G-Box           | CACGTT     | cis-acting regulatory element involved in light responsiveness    |
| PtDIR3 | ABRE            | ACGTG      | cis-acting element involved in the abscisic acid responsiveness   |
| PtDIR4 | LTR             | CCGAAA     | cis-acting element involved in low-temperature responsiveness     |
| PtDIR4 | TCA-element     | CCATCTTTTT | cis-acting element involved in salicylic acid responsiveness      |
| PtDIR4 | TCA-element     | CCATCTTTTT | cis-acting element involved in salicylic acid responsiveness      |
| PtDIR4 | MBS             | CAACTG     | MYB binding site involved in drought-inducibility                 |
| PtDIR4 | CGTCA-motif     | CGTCA      | cis-acting regulatory element involved in the MeJA-responsiveness |
| PtDIR5 | G-Box           | CACGTT     | cis-acting regulatory element involved in light responsiveness    |
| PtDIR5 | ERE             | ATTTTAAA   |                                                                   |
| PtDIR5 | ERE             | ATTTTAAA   |                                                                   |
| PtDIR5 | MBS             | CAACTG     | MYB binding site involved in drought-inducibility                 |
| PtDIR5 | MBS             | CAACTG     | MYB binding site involved in drought-inducibility                 |
| PtDIR5 | MBS             | CAACTG     | MYB binding site involved in drought-inducibility                 |
| PtDIR5 | G-box           | TACGTG     | cis-acting regulatory element involved in light responsiveness    |
| PtDIR5 | LTR             | CCGAAA     | cis-acting element involved in low-temperature responsiveness     |
| PtDIR5 | ABRE            | ACGTG      | cis-acting element involved in the abscisic acid responsiveness   |
| PtDIR5 | ABRE            | ACGTG      | cis-acting element involved in the abscisic acid responsiveness   |
| PtDIR5 | TC-rich repeats | ATTCTCTAAC | cis-acting element involved in defense and stress responsiveness  |
| PtDIR6 | G-box           | TAACACGTAG | cis-acting regulatory element involved in light responsiveness    |
| PtDIR6 | G-box           | TACGTG     | cis-acting regulatory element involved in light responsiveness    |
| PtDIR6 | TGA-element     | AACGAC     | auxin-responsive element                                          |
| PtDIR6 | TCA-element     | CCATCTTTTT | cis-acting element involved in salicylic acid responsiveness      |
| PtDIR6 | G-Box           | CACGTT     | cis-acting regulatory element involved in light responsiveness    |
| PtDIR6 | ERE             | ATTTTAAA   |                                                                   |
| PtDIR6 | CGTCA-motif     | CGTCA      | cis-acting regulatory element involved in the MeJA-responsiveness |
| PtDIR6 | ABRE            | ACGTG      | cis-acting element involved in the abscisic acid responsiveness   |
| PtDIR6 | ABRE            | ACGTG      | cis-acting element involved in the abscisic acid responsiveness   |
| PtDIR7 | CGTCA-motif     | CGTCA      | cis-acting regulatory element involved in the MeJA-responsiveness |
| PtDIR7 | CGTCA-motif     | CGTCA      | cis-acting regulatory element involved in the MeJA-responsiveness |
| PtDIR7 | CGTCA-motif     | CGTCA      | cis-acting regulatory element involved in the MeJA-responsiveness |
| PtDIR7 | ABRE            | CACGTG     | cis-acting element involved in the abscisic acid responsiveness   |
| PtDIR7 | ABRE            | ACGTG      | cis-acting element involved in the abscisic acid responsiveness   |
| PtDIR7 | TGA-element     | AACGAC     | auxin-responsive element                                          |
| PtDIR7 | G-box           | CACGTG     | cis-acting regulatory element involved in light responsiveness    |
| PtDIR7 | TCA-element     | TCAGAAGAGG | cis-acting element involved in salicylic acid responsiveness      |
| PtDIR7 | G-Box           | CACGTG     | cis-acting regulatory element involved in light responsiveness    |

---

|         |             |            |                                                                   |
|---------|-------------|------------|-------------------------------------------------------------------|
| PtDIR7  | MBS         | CAACTG     | MYB binding site involved in drought-inducibility                 |
| PtDIR8  | WUN-motif   | TAATTACTC  |                                                                   |
| PtDIR8  | ABRE        | CACGTG     | cis-acting element involved in the abscisic acid responsiveness   |
| PtDIR8  | ABRE        | ACGTG      | cis-acting element involved in the abscisic acid responsiveness   |
| PtDIR8  | ABRE        | ACGTG      | cis-acting element involved in the abscisic acid responsiveness   |
| PtDIR8  | CGTCA-motif | CGTCA      | cis-acting regulatory element involved in the MeJA-responsiveness |
| PtDIR8  | CGTCA-motif | CGTCA      | cis-acting regulatory element involved in the MeJA-responsiveness |
| PtDIR8  | G-Box       | CACGTG     | cis-acting regulatory element involved in light responsiveness    |
| PtDIR8  | G-Box       | CACGTT     | cis-acting regulatory element involved in light responsiveness    |
| PtDIR8  | ERE         | ATTTTAAA   |                                                                   |
| PtDIR8  | ERE         | ATTTTAAA   |                                                                   |
| PtDIR8  | TCA-element | CCATCTTTTT | cis-acting element involved in salicylic acid responsiveness      |
| PtDIR8  | G-box       | CACGTG     | cis-acting regulatory element involved in light responsiveness    |
| PtDIR9  | ABRE        | ACGTG      | cis-acting element involved in the abscisic acid responsiveness   |
| PtDIR9  | WUN-motif   | TAATTACTC  |                                                                   |
| PtDIR9  | ERE         | ATTTTAAA   |                                                                   |
| PtDIR9  | ERE         | ATTTTAAA   |                                                                   |
| PtDIR9  | G-box       | TACGTG     | cis-acting regulatory element involved in light responsiveness    |
| PtDIR10 | MRE         | AACCTAA    | MYB binding site involved in light responsiveness                 |
| PtDIR10 | ABRE        | ACGTG      | cis-acting element involved in the abscisic acid responsiveness   |
| PtDIR10 | ERE         | ATTTTAAA   |                                                                   |
| PtDIR10 | G-Box       | CACGTT     | cis-acting regulatory element involved in light responsiveness    |
| PtDIR10 | TGA-element | AACGAC     | auxin-responsive element                                          |
| PtDIR10 | TGA-element | AACGAC     | auxin-responsive element                                          |
| PtDIR10 | TCA-element | CCATCTTTTT | cis-acting element involved in salicylic acid responsiveness      |
| PtDIR11 | G-box       | TACGTG     | cis-acting regulatory element involved in light responsiveness    |
| PtDIR11 | TATC-box    | TATCCCA    | cis-acting element involved in gibberellin-responsiveness         |
| PtDIR11 | TCA-element | TCAGAAGAGG | cis-acting element involved in salicylic acid responsiveness      |
| PtDIR11 | TCA-element | CCATCTTTTT | cis-acting element involved in salicylic acid responsiveness      |
| PtDIR11 | G-Box       | CACGTT     | cis-acting regulatory element involved in light responsiveness    |
| PtDIR11 | ERE         | ATTTTAAA   |                                                                   |
| PtDIR11 | CGTCA-motif | CGTCA      | cis-acting regulatory element involved in the MeJA-responsiveness |
| PtDIR11 | ABRE        | ACGTG      | cis-acting element involved in the abscisic acid responsiveness   |
| PtDIR11 | ABRE        | ACGTG      | cis-acting element involved in the abscisic acid responsiveness   |

---



Figure S1. Hormone response pattern analysis of PeDIR genes by bar chart. PeDIR expression in the 'Nanlin 895' response to exogenous hormone (ABA, SA, MeJA, and ETH) treatment for 0, 3, 6, 9, 12, and 24 h.

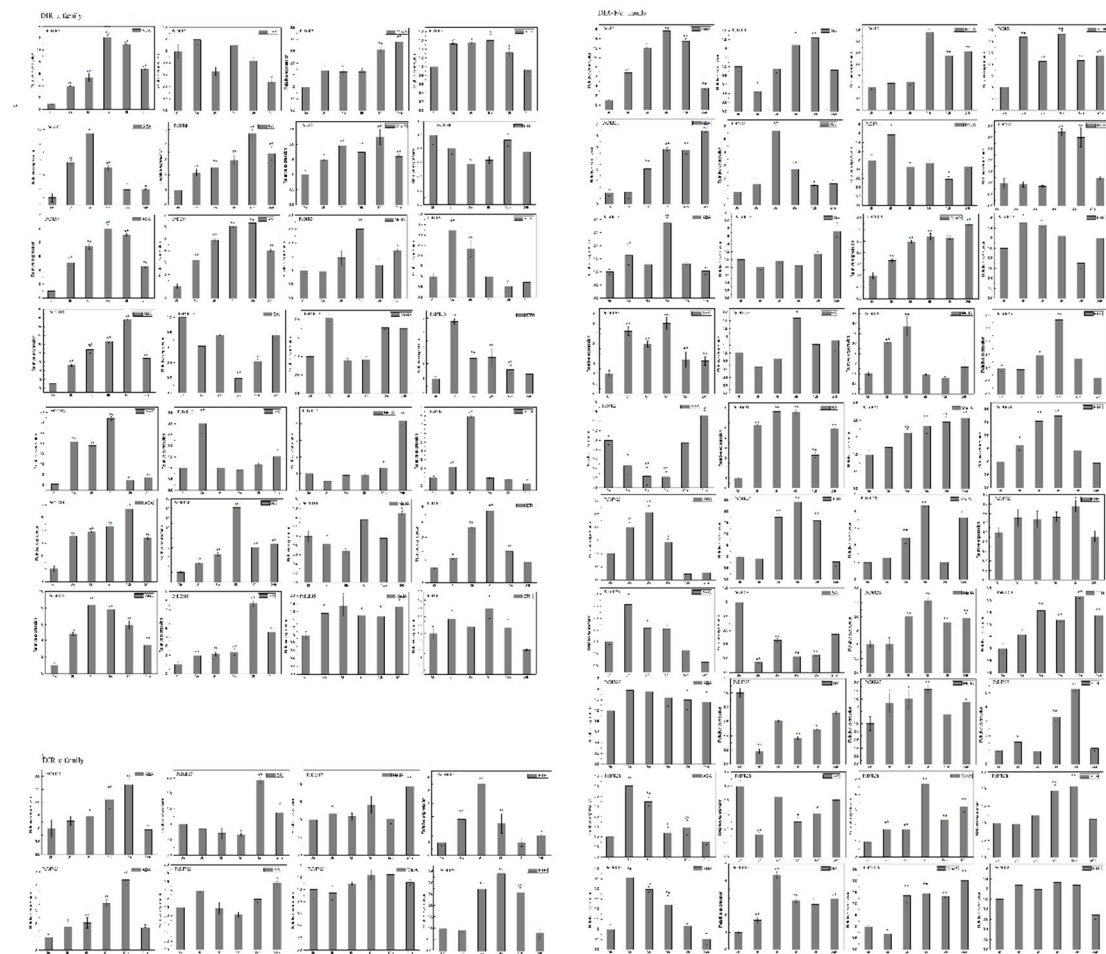

Supplement: s1 [file s1]
